# Supplementary material for: 3-Benzoylisoxazolines by 1,3-Dipolar Cycloaddition: Chloramine-T-Catalyzed Condensation of α-Nitroketones with Dipolarophiles
Source: MDPI journal article supplement (doi:10.3390/molecules26123491), 2021-06-08

## Supporting Information

for

### 3-Benzoylisoxazolines by 1,3-Dipolar Cycloaddition: Chloramine -T -Catalyzed Condensation of $\alpha$ -Nitroketones with Dipolarophiles.

Xinhui Pan <sup>1, 2,†</sup>, Xiaobing Xin <sup>2,3,†</sup>, Ying Mao <sup>4,†</sup>, Xin Li <sup>2</sup>, Yanan Zhao <sup>2</sup>, Yidi Liu <sup>2</sup>, Ke Zhang <sup>2</sup>  
Xiaoda Yang and Jinhui Wang <sup>2\*</sup>

<sup>1</sup> Stake Key Laboratory of Natural and Biomimetic Drugs, and Department of Chemical Biology at School of Pharmaceutical Sciences, Peking University, Beijing, 100191, P. R. China;  
panxhshzu@shzu.edu.cn(X. P.); xyang@bjmu.edu.cn(X. Y.)

<sup>2</sup> Key Laboratory of Xinjiang Phytomedicine Resource and Utilisation, Ministry of Education, School of Pharmaceutical Sciences, Shihezi University, Shihezi 832002, P. R. China;  
18699300391@163.com(X. X.); lixin@stu.shzu.edu.cn(X. L.); zynhyl@stu.shzu.edu.cn(Y. Z.);  
lyd@stu.shzu.edu.cn(Y. L.); xjzk1984@163.com(K. Z.); wangjinhui@hrbmu.edu.cn ( J. W.)

<sup>3</sup> Department of Pharmacology, Houbo College of Xinjiang Medical University, Kelemayi, 834000, P. R. China

<sup>4</sup> School of Chemistry and Chemical Engineering, Shandong University, Jinan 250100, P. R. China;  
maoying1984.@163.com

\* Correspondence: wangjinhui@hrbmu.edu.cn

† These authors contributed equally

## Table of Contents

|                                                                                      |     |
|--------------------------------------------------------------------------------------|-----|
| 1. General Experimental Methods.....                                                 | S2  |
| 2.General procedure for the cycloaddition of alkenes and $\alpha$ -Nitroketones..... | S2  |
| 3. Analytical data for Products.....                                                 | S2  |
| 4. <sup>1</sup> H and <sup>13</sup> C NMR spectra.....                               | S10 |

## EXPERIMENTAL SECTION

**General Experimental Methods.**  $^1\text{H}$  NMR (400 MHz) and  $^{13}\text{C}$  NMR (101 MHz) were recorded at room temperature on DRX-400 spectrometer (Bruker, Germany) in  $\text{CDCl}_3$ . The chemical shifts are given in parts per million (ppm) on the delta ( $\delta$ ) scale. The solvent peak was used as a reference value, for  $^1\text{H}$  NMR:  $\text{CDCl}_3$   $\delta$  7.26; for  $^{13}\text{C}$  NMR:  $\text{CDCl}_3$  at 77.16 ppm. IR spectra were recorded using an Avatar 360 FT-IR ESP spectrometer (Nicolet, USA) at room temperature. HR-ESI-MS spectra were acquired using an Agilent 6210 ESI/TOF mass spectrometer (Agilent Technologies, Santa Clara, CA, USA). Analytical TLC was run on silica gel plates (GF254, Yantai Institute of Chemical Technology, Yantai, China). Spots on the plates were observed under UV light. Column chromatography was performed on silica gel (200~300 mesh and 300~400 mesh; Qingdao Marine Chemical Factory, Qingdao, China). Super-dry solvent  $\text{CH}_3\text{CN}$ , DMSO and DMF were purchased from Aldrich and used as supplied. The  $\alpha$ -nitroketones were synthesized using the same method as reported in the literature<sup>1</sup>.

### General procedure for the cycloaddition of alkenes and $\alpha$ -Nitroketones.

Chloramine-T (0.0625 mmol, 0.5 equiv) was added to a solution of **1** (0.125 mmol, 1 equiv) and **2** (0.625 mmol, 5 equiv) (or **4** [0.625 mmol, 5 equiv] or **6** [0.625 mmol, 5 equiv]) in  $\text{CH}_3\text{CN}$  (0.2 mL). The mixture was then stirred at 80  $^\circ\text{C}$  until the starting material disappeared as monitored by TLC. Subsequently, the mixture was directly purified by flash chromatography (with ethyl acetate/petroleum ether as the eluent) to obtain the desired product (**3**, **5** or **7**).

### Analytical data for Products

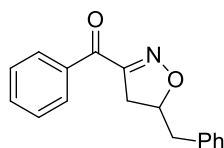

**(5-Benzyl-4,5-dihydroisoxazol-3-yl)(phenyl)methanone (3a)**

The compound was prepared following the general procedure. Yield 77%.  $^1\text{H}$  NMR (400 MHz,  $\text{CDCl}_3$ )  $\delta$  8.22 – 8.12 (m, 2H), 7.63 – 7.57 (m, 1H), 7.51 – 7.44 (m, 2H), 7.38 – 7.33 (m, 2H), 7.28 (m, 3H), 5.08 (ddt,  $J = 10.8, 7.9, 6.3$  Hz, 1H), 3.37 (dd,  $J = 17.6, 10.8$  Hz, 1H), 3.19 – 3.08 (m, 2H), 2.98 (dd,  $J = 14.0, 6.5$  Hz, 1H);  $^{13}\text{C}$  NMR (101 MHz,  $\text{CDCl}_3$ )  $\delta$  186.2, 157.5, 135.8, 135.6, 133.3, 130.1(2C), 129.3(2C), 128.5(2C), 128.1(2C), 126.8, 83.3, 40.7, 38.1; IR  $\nu_{\text{max}}$  3033, 1654, 1581, 710, 672  $\text{cm}^{-1}$ ; HRMS (EI)  $m/z$  calcd for  $\text{C}_{17}\text{H}_{16}\text{NO}_2$   $[\text{M} + \text{H}]^+$  266.1176, found 266.1178. These data are consistent with reported literature values<sup>2</sup>.

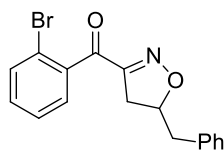

**(5-Benzyl-4,5-dihydroisoxazol-3-yl)(2-bromophenyl)methanone (3b)**

The compound was prepared following the general procedure. Yield 73%.  $^1\text{H}$  NMR (400 MHz,  $\text{CDCl}_3$ )  $\delta$  7.51 (d,  $J = 7.6$  Hz, 1H), 7.29 – 7.25 (m, 2H), 7.24 (m, 2H), 7.21 (m, 1H), 7.18 (m, 2H), 7.15 (m, 1H), 5.05 (ddt,  $J = 11.0, 7.6, 6.3$  Hz, 1H), 3.22 (dd,  $J = 17.5, 10.9$  Hz, 1H), 3.04 – 2.94 (m, 2H), 2.88 (dd,  $J = 14.0, 6.5$  Hz, 1H);  $^{13}\text{C}$  NMR (101 MHz,  $\text{CDCl}_3$ )  $\delta$  189.2, 158.1, 139.2, 135.8, 133.4, 132.1, 129.8, 129.7(2C), 128.8(2C), 127.2, 127.1, 120.0, 85.2, 41.0, 36.7; IR  $\nu_{\text{max}}$  3034, 1680, 1585, 755, 694  $\text{cm}^{-1}$ ; HRMS (EI)  $m/z$  calcd for  $\text{C}_{17}\text{H}_{15}\text{NO}_2\text{Br}$   $[\text{M} + \text{H}]^+$  344.0281, found 344.0279.

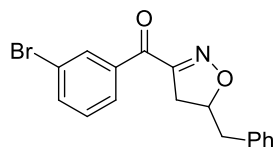

**(5-Benzyl-4,5-dihydroisoxazol-3-yl)(3-bromophenyl)methanone (3c)**

The compound was prepared following the general procedure. Yield 67%.  $^1\text{H}$  NMR (400 MHz,  $\text{CDCl}_3$ )  $\delta$  8.24 (m, 1H), 8.07 (m, 1H), 7.70 (m, 1H), 7.37 – 7.33 (m, 2H), 7.32 (m, 1H), 7.27 (m, 3H), 5.16 – 5.03 (m, 1H), 3.34 (dd,  $J = 17.6, 10.9$  Hz, 1H), 3.16 – 3.05 (m, 2H), 2.98 (dd,  $J = 14.0, 6.4$  Hz, 1H);  $^{13}\text{C}$  NMR (101 MHz,  $\text{CDCl}_3$ )  $\delta$  185.0, 157.6, 137.5, 136.4, 135.9, 133.2, 129.9, 129.6(2C), 128.9,

128.8(2C), 127.2, 122.6, 83.9, 40.9, 38.1; IR  $\nu_{\text{max}}$  3038, 1691, 1616, 910, 811, 742  $\text{cm}^{-1}$ ; HRMS (EI)  $m/z$  calcd for  $\text{C}_{17}\text{H}_{15}\text{NO}_2\text{Br}$   $[\text{M} + \text{H}]^+$  344.0281, found 344.0293.

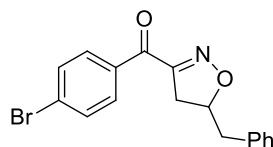

**(5-Benzyl-4,5-dihydroisoxazol-3-yl)(4-bromophenyl)methanone (3d)**

The compound was prepared following the general procedure. Yield 72%.  $^1\text{H}$  NMR (400 MHz,  $\text{CDCl}_3$ )  $\delta$  8.04 – 7.97 (m, 2H), 7.62 – 7.56 (m, 2H), 7.35 – 7.30 (m, 2H), 7.25 (m, 3H), 5.07 (ddt,  $J = 10.9, 7.9, 6.3$  Hz, 1H), 3.34 (dd,  $J = 17.6, 10.9$  Hz, 1H), 3.13 – 3.05 (m, 2H), 2.96 (dd,  $J = 14.0, 6.5$  Hz, 1H).;  $^{13}\text{C}$  NMR (101 MHz,  $\text{CDCl}_3$ )  $\delta$  185.4, 157.9, 136.1, 134.6, 132.0(2C), 131.9(2C), 129.7(2C), 129.2, 128.9(2C), 127.2, 83.9, 41.1, 38.3; IR  $\nu_{\text{max}}$  3046, 1696, 1615, 801, 750, 686  $\text{cm}^{-1}$ ; HRMS (EI)  $m/z$  calcd for  $\text{C}_{17}\text{H}_{15}\text{NO}_2\text{Br}$   $[\text{M} + \text{H}]^+$  344.0281, found 344.0276.

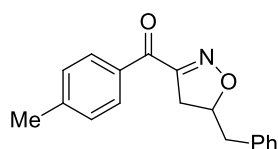

**(5-Benzyl-4,5-dihydroisoxazol-3-yl)(p-tolyl)methanone (3e)**

The compound was prepared following the general procedure. Yield 68%.  $^1\text{H}$  NMR (400 MHz,  $\text{CDCl}_3$ )  $\delta$  8.08 – 8.03 (m, 2H), 7.33 (m, 2H), 7.28 (m, 2H), 7.25 (m, 3H), 5.05 (ddt,  $J = 10.8, 7.9, 6.3$  Hz, 1H), 3.35 (dd,  $J = 17.6, 10.8$  Hz, 1H), 3.15 – 3.07 (m, 2H), 2.96 (dd,  $J = 14.0, 6.6$  Hz, 1H), 2.42 (s, 3H);  $^{13}\text{C}$  NMR (101 MHz,  $\text{CDCl}_3$ )  $\delta$  186.1, 157.9, 144.7, 136.2, 133.4, 130.6(2C), 129.6(2C), 129.2(2C), 128.8(2C), 127.1, 83.5, 41.1, 38.6, 21.9; IR  $\nu_{\text{max}}$  3023, 2923, 1650, 1600, 831, 750, 693  $\text{cm}^{-1}$ ; HRMS (EI)  $m/z$  calcd for  $\text{C}_{18}\text{H}_{18}\text{NO}_2$   $[\text{M} + \text{H}]^+$  280.1332, found 280.1336.

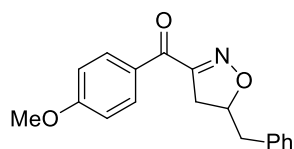

**(5-Benzyl-4,5-dihydroisoxazol-3-yl)(4-methoxyphenyl)methanone (3f)**

The compound was prepared following the general procedure. Yield 54%.  $^1\text{H}$  NMR (400 MHz,  $\text{CDCl}_3$ )  $\delta$  8.23 – 8.15 (m, 2H), 7.36 – 7.30 (m, 2H), 7.29 – 7.25 (m, 3H), 6.97 – 6.91 (m, 2H), 5.04 (ddt,  $J = 10.8, 7.9, 6.4$  Hz, 1H), 3.88 (s, 3H), 3.36 (dd,

$J = 17.6, 10.8$  Hz, 1H), 3.16 – 3.07 (m, 2H), 2.96 (dd,  $J = 14.0, 6.6$  Hz, 1H);  $^{13}\text{C}$  NMR (101 MHz,  $\text{CDCl}_3$ )  $\delta$  184.7, 164.2, 157.9, 136.3, 132.9(2C), 129.6(2C), 128.8(2C), 127.1, 113.8(2C), 83.3, 55.7, 41.1, 38.8; IR  $\nu_{\text{max}}$  3022, 2801, 1618, 1531, 802, 719, 676  $\text{cm}^{-1}$ ; HRMS (EI)  $m/z$  calcd for  $\text{C}_{18}\text{H}_{18}\text{NO}_3$   $[\text{M} + \text{H}]^+$  296.1281, found 296.1285.

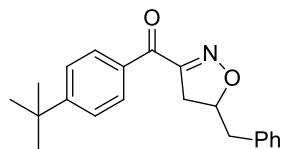

**(5-Benzyl-4,5-dihydroisoxazol-3-yl)(4-tert-butylphenyl)methanone (3g)**

The compound was prepared following the general procedure. Yield 63%.  $^1\text{H}$  NMR (400 MHz,  $\text{CDCl}_3$ )  $\delta$  8.10 – 8.05 (m, 2H), 7.49 – 7.43 (m, 2H), 7.34 – 7.23 (m, 5H), 5.02 (ddt,  $J = 10.8, 7.9, 6.3$  Hz, 1H), 3.32 (dd,  $J = 17.6, 10.8$  Hz, 1H), 3.14 – 3.04 (m, 2H), 2.93 (dd,  $J = 14.0, 6.5$  Hz, 1H), 1.34 (d,  $J = 4.4$  Hz, 9H);  $^{13}\text{C}$  NMR (101 MHz,  $\text{CDCl}_3$ )  $\delta$  186.0, 157.8, 157.4, 136.2, 133.3, 130.3(2C), 129.5(2C), 128.7(2C), 126.9, 125.4(2C), 83.4, 40.9, 38.4, 35.2, 31.1(3C); IR  $\nu_{\text{max}}$  3030, 1660, 1601, 1403, 1375, 860, 750, 700  $\text{cm}^{-1}$ ; HRMS (EI)  $m/z$  calcd for  $\text{C}_{21}\text{H}_{24}\text{NO}_2$   $[\text{M} + \text{H}]^+$  322.1802, found 322.1808.

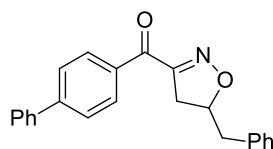

**[1,1'-Biphenyl]-4-yl(5-benzyl-4,5-dihydroisoxazol-3-yl)methanone (3h).**

The compound was prepared following the general procedure. Yield 57%.  $^1\text{H}$  NMR (400 MHz,  $\text{CDCl}_3$ )  $\delta$  8.25 – 8.19 (m, 2H), 7.69 – 7.68 (m, 1H), 7.67 (m, 1H), 7.65 (m, 1H), 7.63 (m, 1H), 7.49 (m, 1H), 7.47 (m, 1H), 7.46 (m, 1H), 7.43 (m, 1H), 7.35 – 7.33 (m, 1H), 7.32 (m, 1H), 7.30 – 7.28 (m, 2H), 5.08 (ddt,  $J = 10.8, 7.9, 6.3$  Hz, 1H), 3.38 (dd,  $J = 17.6, 10.8$  Hz, 1H), 3.17 – 3.09 (m, 2H), 2.98 (dd,  $J = 14.0, 6.5$  Hz, 1H);  $^{13}\text{C}$  NMR (101 MHz,  $\text{CDCl}_3$ )  $\delta$  186.0, 157.9, 146.4, 139.9, 136.2, 134.6, 131.0(2C), 129.6(2C), 129.1(2C), 128.8(2C), 128.5(2C), 127.5(2C), 127.1(2C), 83.7, 41.1, 38.5; IR  $\nu_{\text{max}}$  3029, 1655, 1648, 1401, 1362, 842, 746, 693  $\text{cm}^{-1}$ ; HRMS (EI)  $m/z$  calcd for  $\text{C}_{23}\text{H}_{20}\text{NO}_2$   $[\text{M} + \text{H}]^+$  342.1489, found 342.1483. These data are consistent with reported literature values<sup>2</sup>.

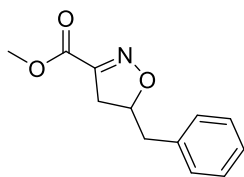

**Methyl 5-benzyl-4,5-dihydroisoxazole-3-carboxylate (3i)**

The compound was prepared following the general procedure. Yield 30%.  $^1\text{H}$  NMR (400 MHz,  $\text{CDCl}_3$ )  $\delta$  7.32 (m, 2H), 7.26 (m, 1H), 7.22 (m, 2H), 5.06 (ddd,  $J = 14.7$ , 10.9, 6.7 Hz, 1H), 3.86 (s, 3H), 3.18 (dd,  $J = 17.7$ , 10.9 Hz, 1H), 3.11 (dd,  $J = 14.0$ , 6.1 Hz, 1H), 2.94 (dd,  $J = 14.8$ , 5.3 Hz, 1H), 2.92 – 2.85 (m, 1H);  $^{13}\text{C}$  NMR (101 MHz,  $\text{CDCl}_3$ )  $\delta$  161.2, 151.3, 136.0, 129.5(2C), 128.8(2C), 127.1, 84.5, 52.8, 40.8, 37.9; IR  $\nu_{\text{max}}$  3418, 3032, 1717, 1584, 1449, 1366, 1265, 1126, 949, 746, 702, 582  $\text{cm}^{-1}$ ; HRMS (EI)  $m/z$  calcd for  $\text{C}_{12}\text{H}_{14}\text{NO}_3$   $[\text{M} + \text{H}]^+$  220.0974, found 220.0980.

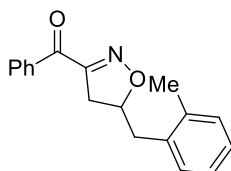

**(5-(2-Methylbenzyl)-4,5-dihydroisoxazol-3-yl)(phenyl)methanone (5a)**

The compounds was prepared following the general procedure as isomers. Yield 71%.  $^1\text{H}$  NMR (400 MHz,  $\text{CDCl}_3$ )  $\delta$  8.30 – 8.23 (m, 2H), 7.66 (m, 1H), 7.57 – 7.49 (m, 2H), 7.30 – 7.23 (m, 4H), 5.19 – 5.08 (m, 1H), 3.42 (ddd,  $J = 17.5$ , 10.7, 0.9 Hz, 1H), 3.22 (dt,  $J = 12.6$ , 7.5 Hz, 2H), 2.99 (dd,  $J = 14.3$ , 6.7 Hz, 1H), 2.44 (s, 3H);  $^{13}\text{C}$  NMR (101 MHz,  $\text{CDCl}_3$ )  $\delta$  186.5, 157.9, 136.6, 135.9, 134.6, 133.6, 130.6, 130.4(2C), 130.0, 128.4(2C), 127.1, 126.3, 82.9, 38.6, 38.1, 19.8; IR  $\nu_{\text{max}}$  3028, 2940, 1660, 1570, 750, 690  $\text{cm}^{-1}$ ; HRMS (EI)  $m/z$  calcd for  $\text{C}_{18}\text{H}_{18}\text{NO}_2$   $[\text{M} + \text{H}]^+$  280.1332, found 280.1335.

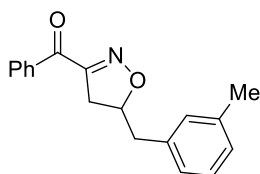

**(5-(3-Methylbenzyl)-4,5-dihydroisoxazol-3-yl)(phenyl)methanone (5b)**

The compound was prepared following the general procedure. Yield 66%.  $^1\text{H}$  NMR (400 MHz,  $\text{CDCl}_3$ )  $\delta$  8.15 (d,  $J = 7.2$  Hz, 2H), 7.59 (m, 1H), 7.47 (m, 2H), 7.22

(m, 1H), 7.09 (m, 3H), 5.12 – 5.00 (m, 1H), 3.35 (dd,  $J = 17.5, 10.8$ , 1H), 3.17 – 3.04 (m, 2H), 2.97 – 2.87 (m, 1H), 2.36 (s, 3H);  $^{13}\text{C}$  NMR (101 MHz,  $\text{CDCl}_3$ )  $\delta$  186.6, 157.8, 138.4, 136.1, 135.9, 133.7, 130.4(2C), 130.4, 128.7, 128.5(2C), 127.9, 126.6, 83.8, 40.9, 38.5, 21.5; IR  $\nu_{\text{max}}$  3048, 2908, 1661, 1581, 862, 750, 691  $\text{cm}^{-1}$ ; HRMS (EI)  $m/z$  calcd for  $\text{C}_{18}\text{H}_{18}\text{NO}_2$   $[\text{M} + \text{H}]^+$  280.1332, found 280.1340.

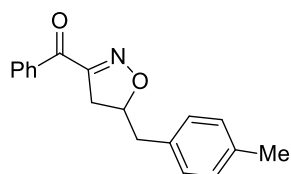

**(5-(4-Methylbenzyl)-4,5-dihydroisoxazol-3-yl)(phenyl)methanone (5c)**

The compound was prepared following the general procedure. Yield 64%.  $^1\text{H}$  NMR (400 MHz,  $\text{CDCl}_3$ )  $\delta$  8.16 – 8.10 (m, 2H), 7.59 (m, 1H), 7.46 (m, 2H), 7.16 (m, 4H), 5.05 (dd,  $J = 11.0, 7.8$  Hz, 1H), 3.35 (dd,  $J = 17.6, 10.8$  Hz, 1H), 3.15 – 3.04 (m, 2H), 2.93 (dd,  $J = 14.0, 6.6$  Hz, 1H), 2.34 (s, 3H);  $^{13}\text{C}$  NMR (101 MHz,  $\text{CDCl}_3$ )  $\delta$  186.7, 157.9, 136.8, 136.1, 133.8, 133.2, 130.5(2C), 129.6(2C), 129.6(2C), 128.6(2C), 83.9, 40.7, 38.5, 21.3; IR  $\nu_{\text{max}}$  3039, 2909, 1710, 1609, 822, 741, 680  $\text{cm}^{-1}$ ; HRMS (EI)  $m/z$  calcd for  $\text{C}_{18}\text{H}_{18}\text{NO}_2$   $[\text{M} + \text{H}]^+$  280.1332, found 280.1339.

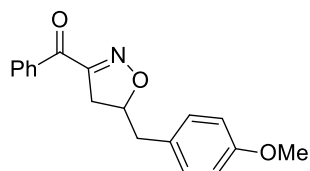

**(5-(4-Methoxybenzyl)-4,5-dihydroisoxazol-3-yl)(phenyl)methanone (5d)**

The compound was prepared following the general procedure. Yield 72%.  $^1\text{H}$  NMR (400 MHz,  $\text{CDCl}_3$ )  $\delta$  8.12 (m, 2H), 7.58 (m, 1H), 7.45 (m, 2H), 7.18 (m, 2H), 6.86 (m, 2H), 5.08 – 4.96 (m, 1H), 3.78 (s, 3H), 3.34 (dd,  $J = 17.6, 10.8$  Hz, 1H), 3.14 – 2.99 (m, 2H), 2.91 (dd,  $J = 14.1, 6.4$  Hz, 1H);  $^{13}\text{C}$  NMR (101 MHz,  $\text{CDCl}_3$ )  $\delta$  186.6, 158.7, 157.8, 135.9, 133.6, 130.6(2C), 130.4(2C), 128.4(2C), 128.1, 114.2(2C), 83.8, 55.3, 40.0, 38.3; IR  $\nu_{\text{max}}$  3050, 2850, 1670, 1580, 820, 750, 691  $\text{cm}^{-1}$ ; HRMS (EI)  $m/z$  calcd for  $\text{C}_{18}\text{H}_{18}\text{NO}_3$   $[\text{M} + \text{H}]^+$  296.1281, found 296.1285.

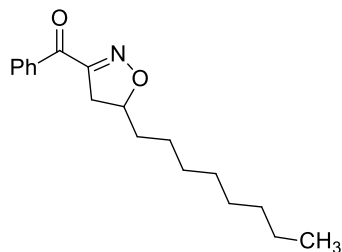

**(5-Octyl-4,5-dihydroisoxazol-3-yl)(phenyl)methanone (5e)**

The compound was prepared following the general procedure. Yield 89%.  $^1\text{H}$  NMR (400 MHz,  $\text{CDCl}_3$ )  $\delta$  8.25 – 8.12 (m, 2H), 7.58 (m, 1H), 7.46 (m, 2H), 4.79 (ddt,  $J = 10.9, 8.4, 6.6$  Hz, 1H), 3.39 (dd,  $J = 17.4, 10.9$  Hz, 1H), 3.00 (dd,  $J = 17.4, 8.5$  Hz, 1H), 1.79 (m, 1H), 1.69 – 1.57 (m, 1H), 1.45 – 1.19 (m, 12H), 0.88 (m, 3H);  $^{13}\text{C}$  NMR (101 MHz,  $\text{CDCl}_3$ )  $\delta$  186.7, 157.9, 136.0, 133.6, 130.5(2C), 128.5(2C), 83.7, 38.9, 35.3, 31.9, 29.6, 29.5, 29.3, 25.4, 22.8, 14.2; IR  $\nu_{\text{max}}$  3062, 2948, 1635, 1541, 760, 710  $\text{cm}^{-1}$ ; HRMS (EI)  $m/z$  calcd for  $\text{C}_{18}\text{H}_{26}\text{NO}_2$   $[\text{M} + \text{H}]^+$  288.1958, found 288.1961. These data are consistent with reported literature values<sup>2</sup>.

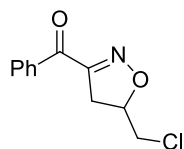

**(5-(Chloromethyl)-4,5-dihydroisoxazol-3-yl)(phenyl)methanone (5f)**

The compound was prepared following the general procedure. Yield 83%.  $^1\text{H}$  NMR (400 MHz,  $\text{CDCl}_3$ )  $\delta$  8.24 – 8.14 (m, 2H), 7.66 – 7.55 (m, 1H), 7.53 – 7.44 (m, 2H), 5.05 (dddd,  $J = 11.1, 7.1, 5.7, 4.5$  Hz, 1H), 3.76 – 3.62 (m, 2H), 3.50 (dd,  $J = 17.9, 11.1$  Hz, 1H), 3.36 (dd,  $J = 17.9, 7.1$  Hz, 1H);  $^{13}\text{C}$  NMR (101 MHz,  $\text{CDCl}_3$ )  $\delta$  186.0, 157.5, 135.7, 133.9, 130.5(2C), 128.6(2C), 81.2, 45.1, 37.7; IR  $\nu_{\text{max}}$  3025, 1660, 1580, 700  $\text{cm}^{-1}$ ; HRMS (EI)  $m/z$  calcd for  $\text{C}_{11}\text{H}_{11}\text{NO}_2\text{Cl}$   $[\text{M} + \text{H}]^+$  224.0473, found 224.0466. These data are consistent with reported literature values<sup>2</sup>.

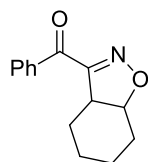

**(3a,4,5,6,7,7a-Hexahydrobenzo[d]isoxazol-3-yl)(phenyl)methanone (5g)**

The compound was prepared following the general procedure. Yield 54%.  $^1\text{H}$  NMR (400 MHz,  $\text{CDCl}_3$ )  $\delta$  8.18 (m, 2H), 7.61 – 7.56 (m, 1H), 7.47 (m, 2H), 4.59 (dt,



$J = 7.9, 3.9$  Hz, 1H), 3.46 – 3.38 (m, 1H), 2.20 (dd,  $J = 15.2, 3.5$  Hz, 1H), 2.11 – 2.01 (m, 1H), 1.82 (tt,  $J = 15.3, 4.7$  Hz, 1H), 1.65 – 1.52 (m, 3H), 1.35 – 1.24 (m, 2H);  $^{13}\text{C}$  NMR (101 MHz,  $\text{CDCl}_3$ )  $\delta$  187.0, 163.8, 136.4, 133.6, 130.4(2C), 128.5(2C), 82.3, 44.3, 25.6, 25.0, 21.7, 19.9; IR  $\nu_{\text{max}}$  3060, 2940, 1660, 1550, 747, 704  $\text{cm}^{-1}$ ; HRMS (EI)  $m/z$  calcd for  $\text{C}_{14}\text{H}_{16}\text{NO}_2$   $[\text{M} + \text{H}]^+$  230.1176, found 230.1182. These data are consistent with reported literature values<sup>2</sup>.

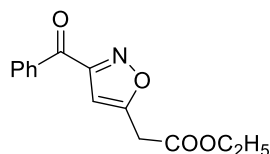

#### **Ethyl 3-benzoyl-4,5-dihydroisoxazole-5-carboxylate (7a)**

The compound was prepared following the general procedure. Yield 68%.  $^1\text{H}$  NMR (400 MHz,  $\text{CDCl}_3$ )  $\delta$  8.33 – 8.28 (m, 2H), 7.71 – 7.65 (m, 1H), 7.59 – 7.51 (m, 2H), 7.43 (s, 1H), 4.48 (q,  $J = 7.1$  Hz, 2H), 1.44 (t,  $J = 7.1$  Hz, 3H);  $^{13}\text{C}$  NMR (101 MHz,  $\text{CDCl}_3$ )  $\delta$  184.7, 162.3, 161.3, 156.4, 135.3, 134.6, 130.9(2C), 128.9(2C), 110.2, 62.8, 14.3; IR  $\nu_{\text{max}}$  3058, 2945, 1655, 1545, 740, 702  $\text{cm}^{-1}$ ; HRMS (EI)  $m/z$  calcd for  $\text{C}_{13}\text{H}_{14}\text{NO}_2$   $[\text{M} + \text{H}]^+$  248.0917, found 248.0912.

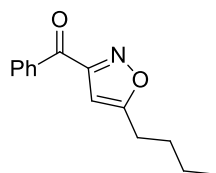

#### **(5-Butylisoxazol-3-yl)(phenyl)methanone (7b).**

The compound was prepared following the general procedure. Yield 64%.  $^1\text{H}$  NMR (400 MHz,  $\text{CDCl}_3$ )  $\delta$  8.29 (m, 2H), 7.61 (m, 1H), 7.49 (m, 2H), 6.51 (ms, 1H), 2.82 (t,  $J = 7.6$  Hz, 2H), 1.73 (dt,  $J = 15.2, 7.5$  Hz, 2H), 1.42 (dq,  $J = 14.6, 7.4$  Hz, 2H), 0.95 (t,  $J = 7.4$  Hz, 3H);  $^{13}\text{C}$  NMR (101 MHz,  $\text{CDCl}_3$ )  $\delta$  186.2, 174.8, 161.9, 135.9, 133.9, 130.7(2C), 128.6(2C), 101.7, 29.6, 26.4, 22.3, 13.8. IR  $\nu_{\text{max}}$  3075, 2950, 2875, 1670, 1590, 740, 690  $\text{cm}^{-1}$ ; HRMS (EI)  $m/z$  calcd for  $\text{C}_{14}\text{H}_{16}\text{NO}_2$   $[\text{M} + \text{H}]^+$  230.1176, found 230.1171. These data are consistent with reported literature values<sup>2</sup>.

## References

1. Lee, J. J.; Kim, J.; Jun, Y. M.; Lee, B. M.; Kim, B. H., Indium-mediated one-pot synthesis of benzoxazoles or oxazoles from 2-nitrophenols or 1-aryl-2-nitroethanones. *Tetrahedron* **2009**, 65 (43), 8821-8831.
2. Itoh, K.-i.; Aoyama, T.; Satoh, H.; Fujii, Y.; Sakamaki, H.; Takido, T.; Kodomari, M., Application of silica gel-supported polyphosphoric acid (PPA/SiO<sub>2</sub>) as a reusable solid acid catalyst to the synthesis of 3-benzoylisoxazoles and isoxazolines. *Tetrahedron Letters* **2011**, 52 (51), 6892-6895.

## <sup>1</sup>H and <sup>13</sup>C NMR spectra

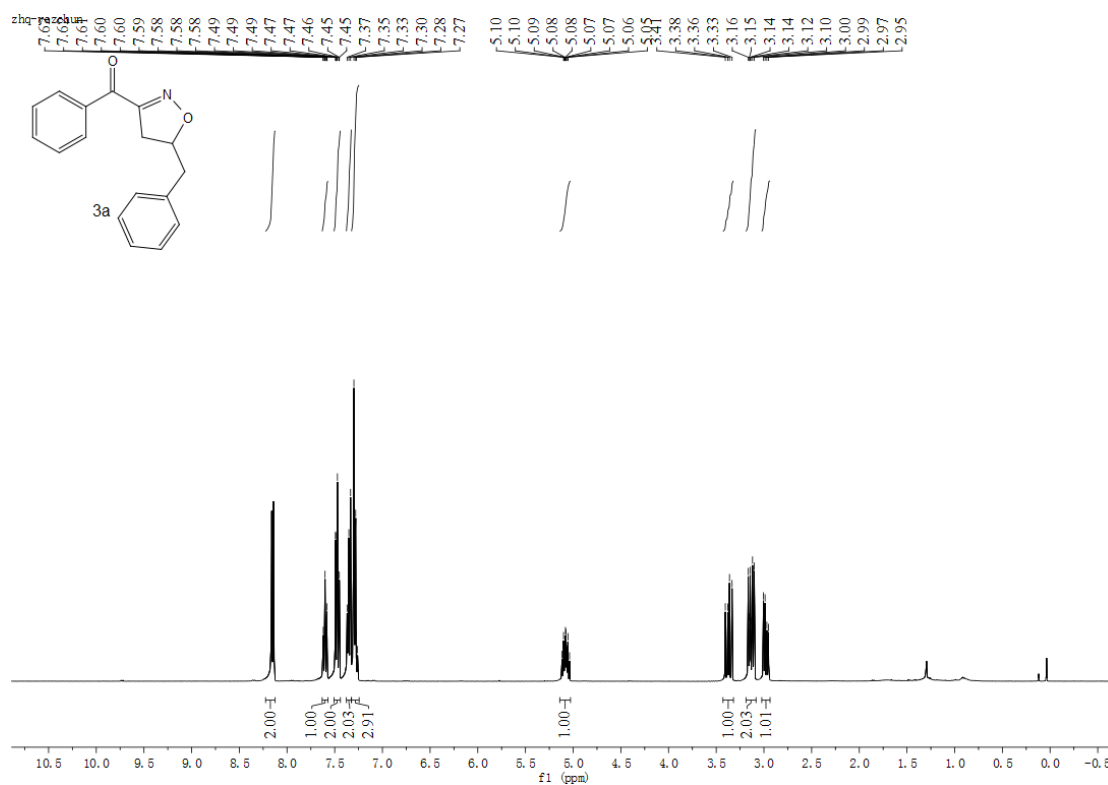

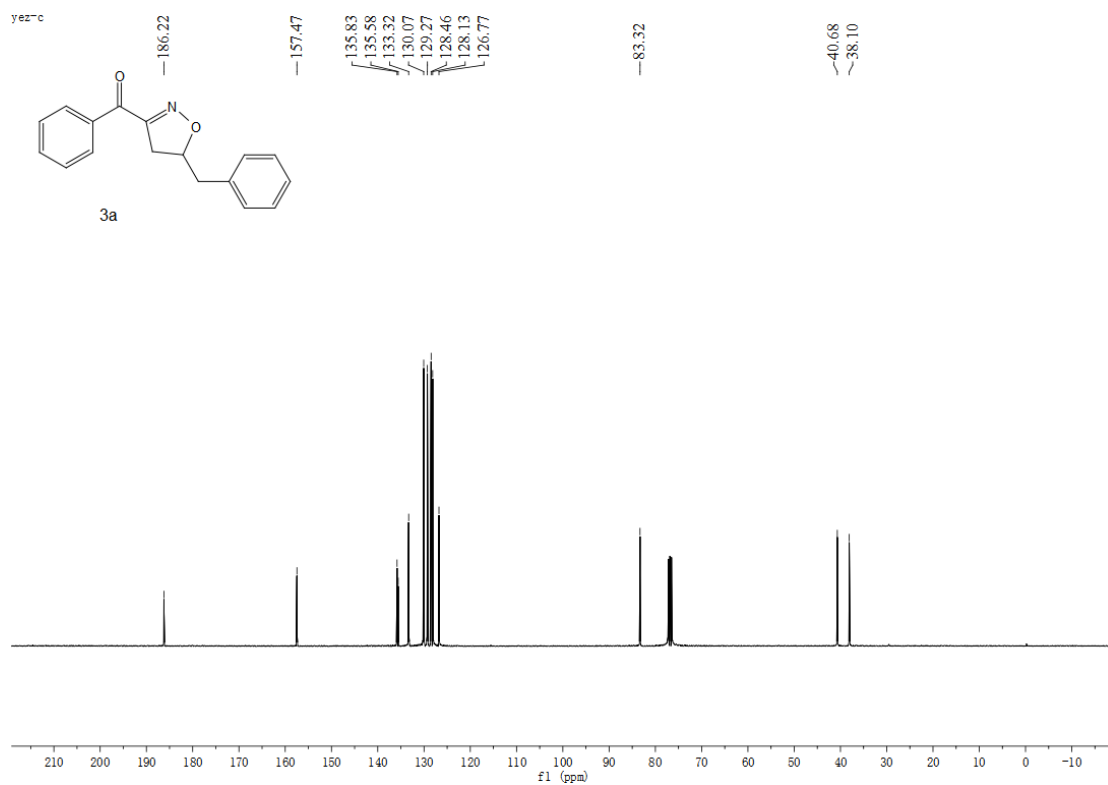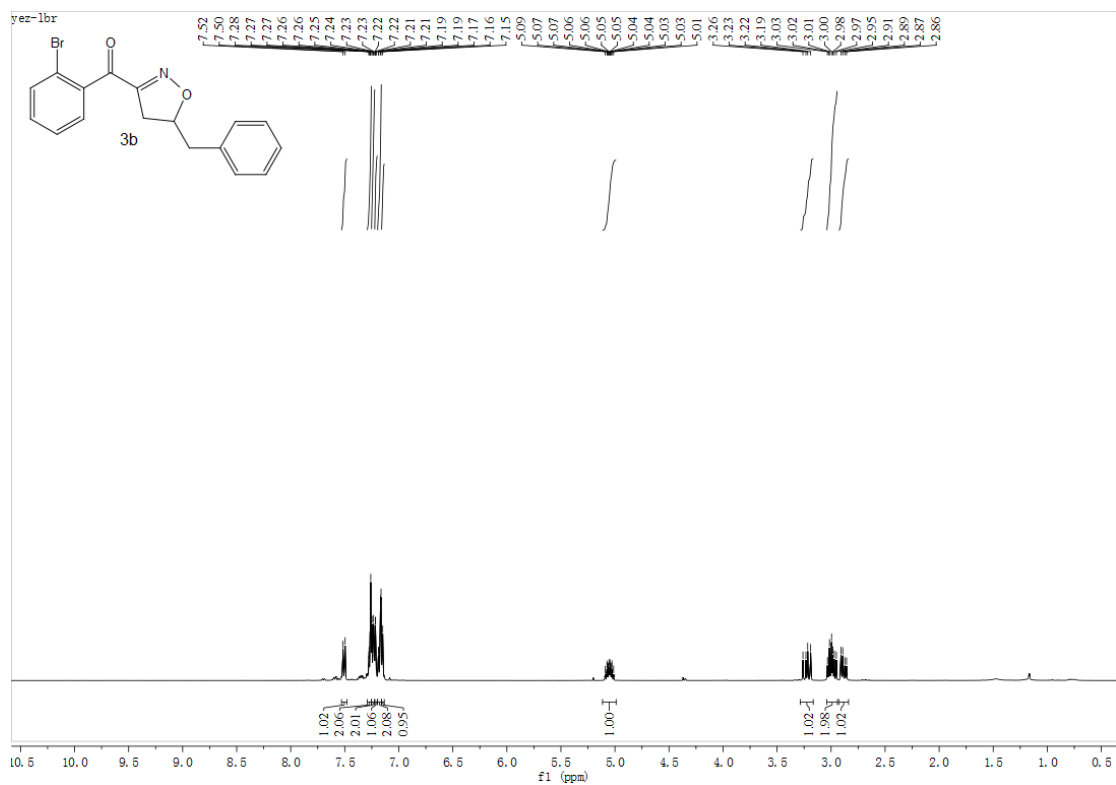

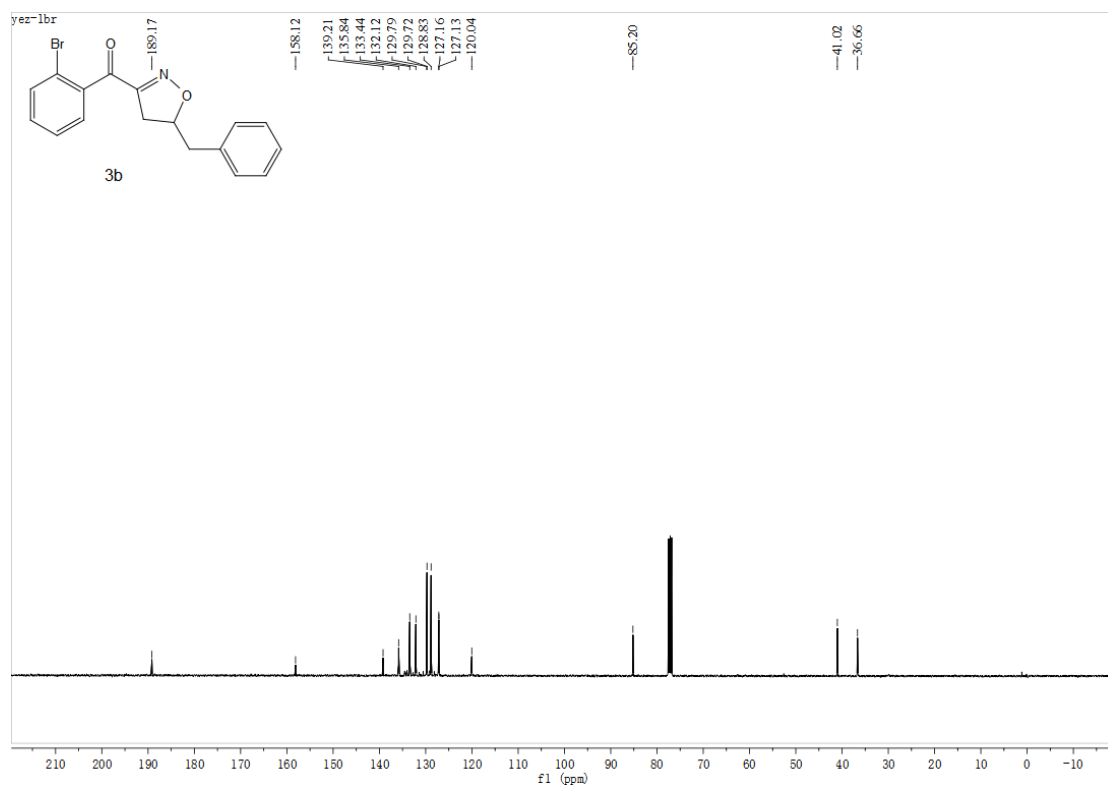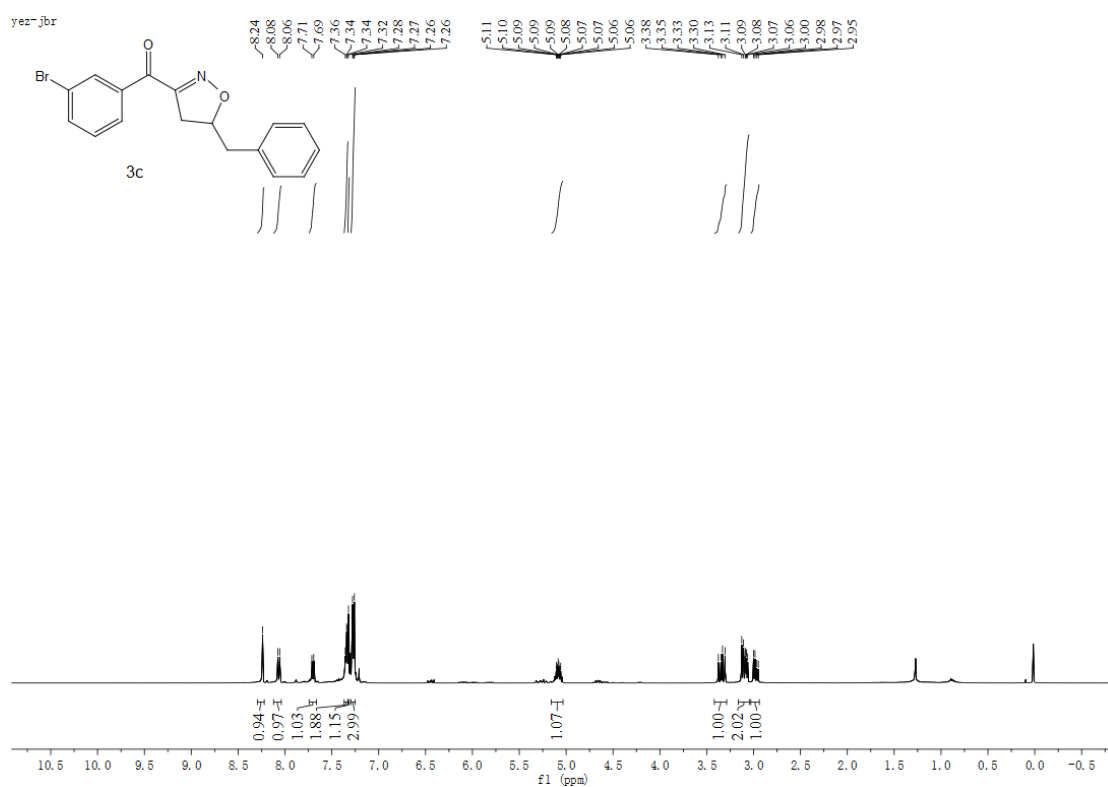

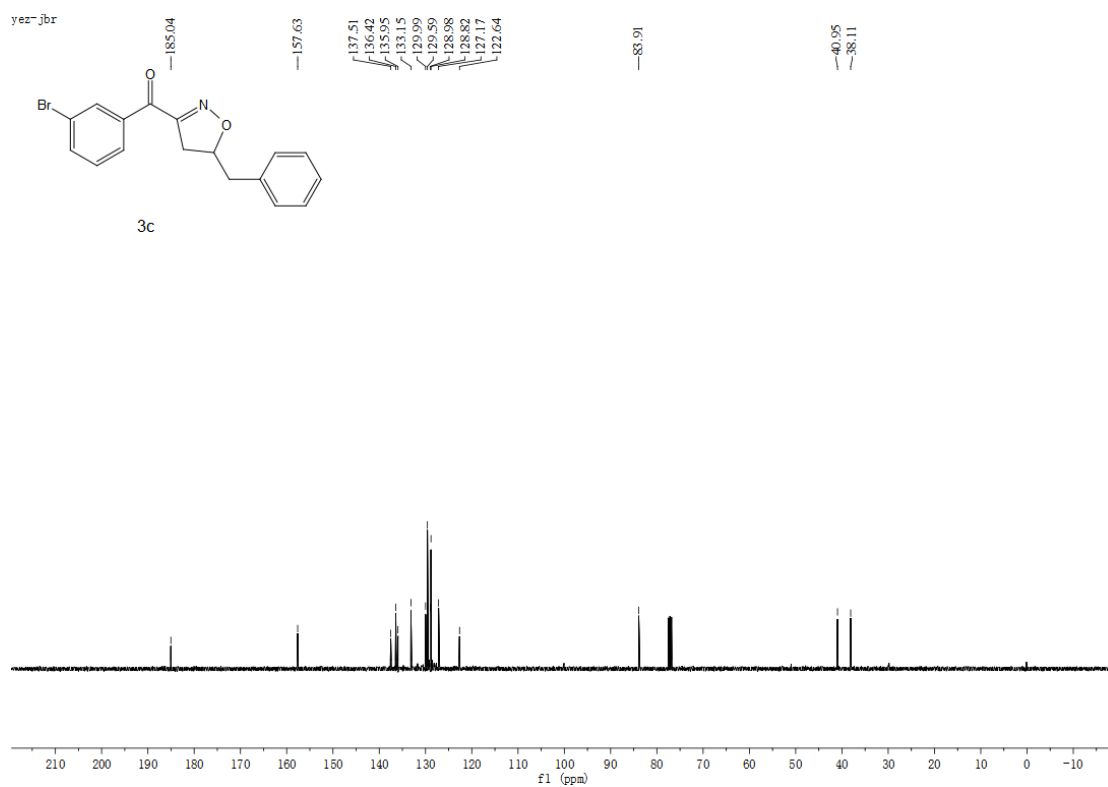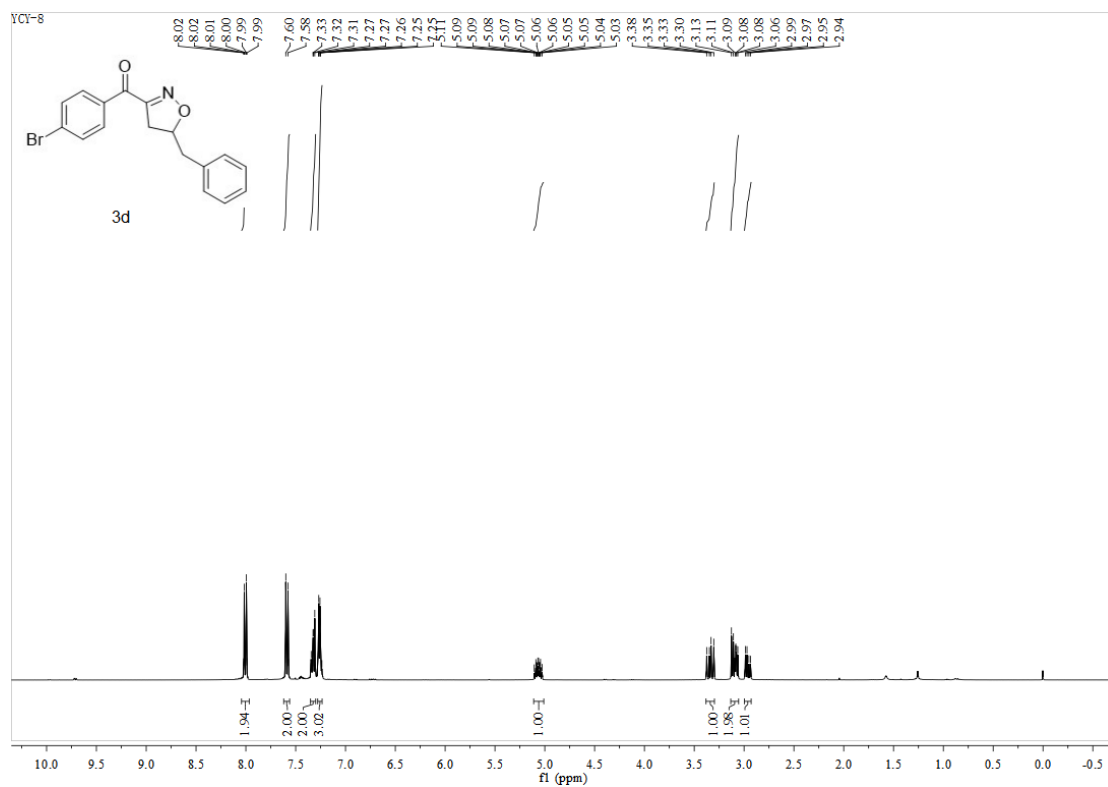

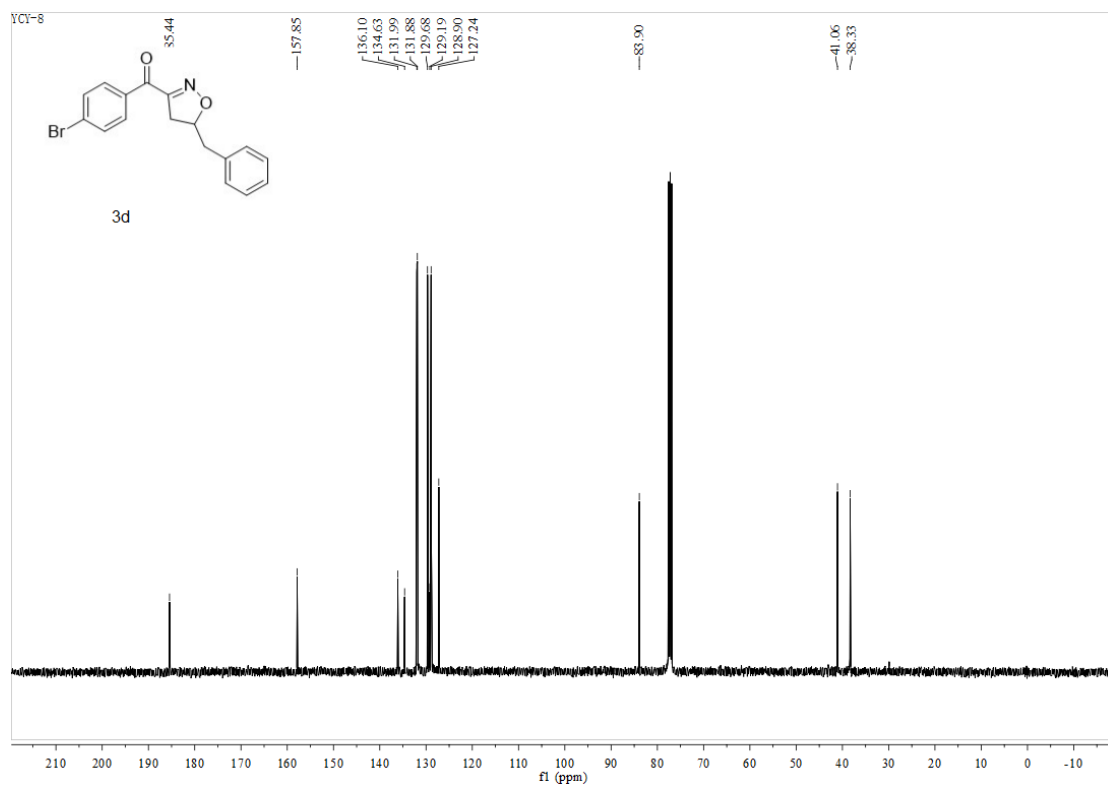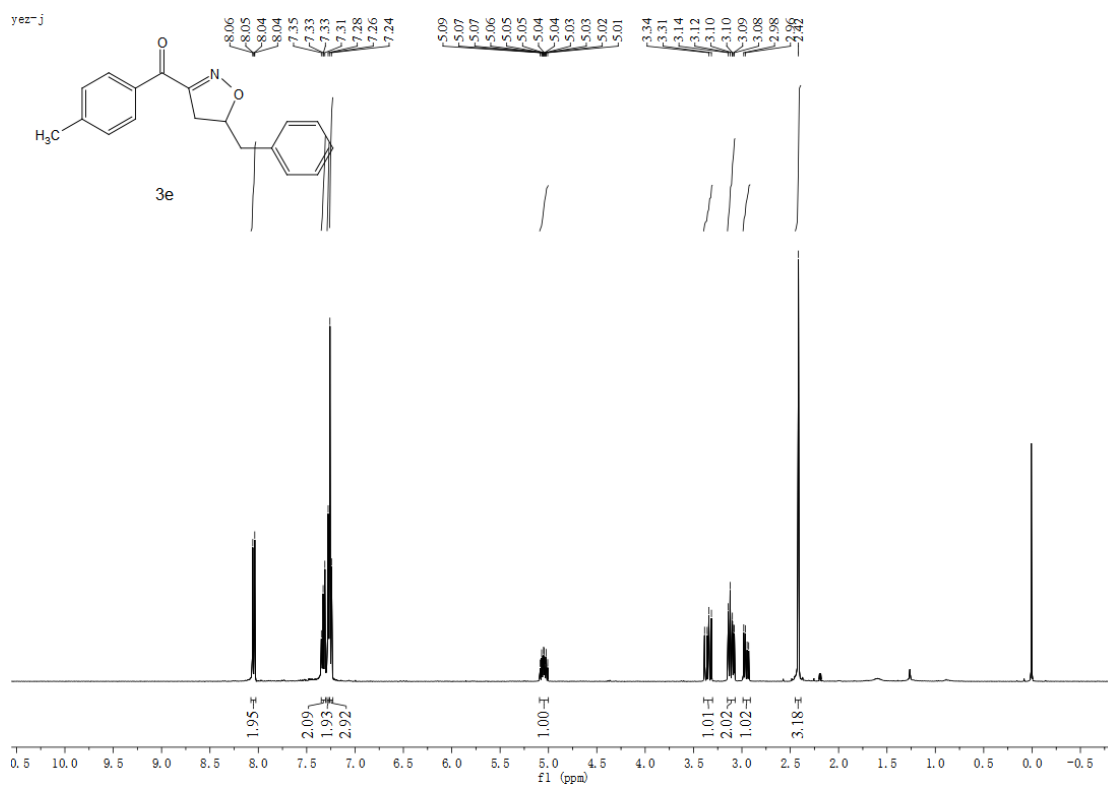

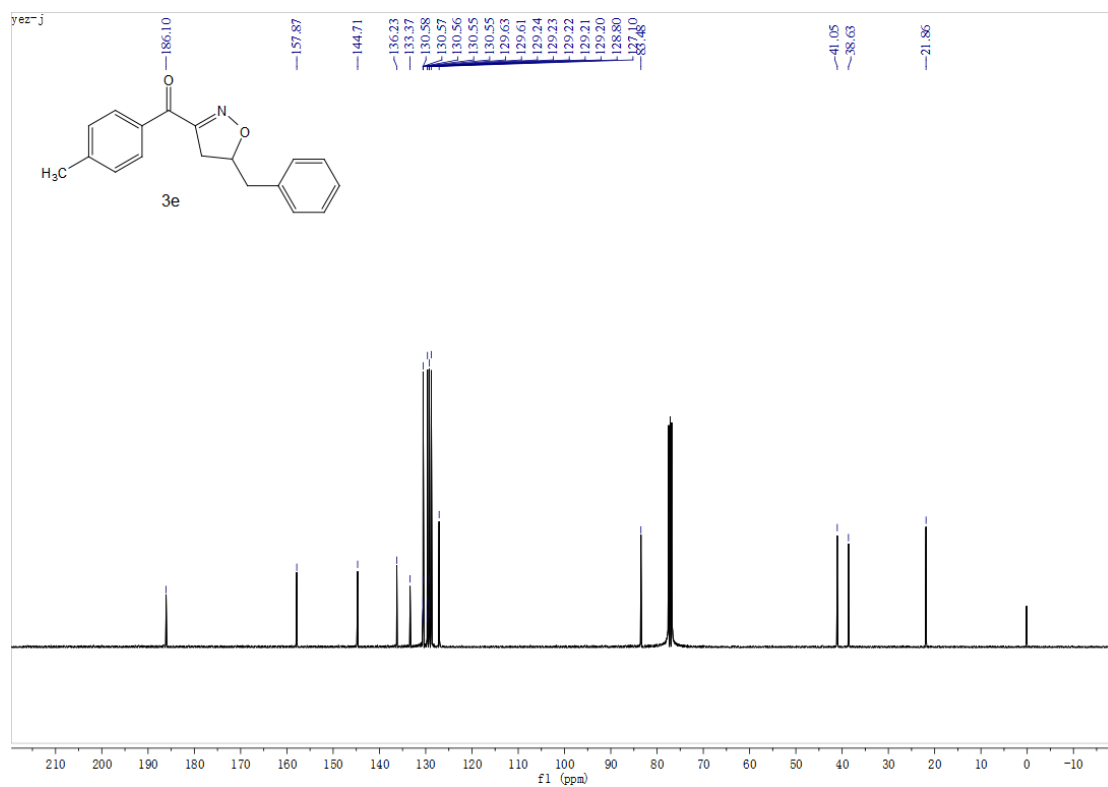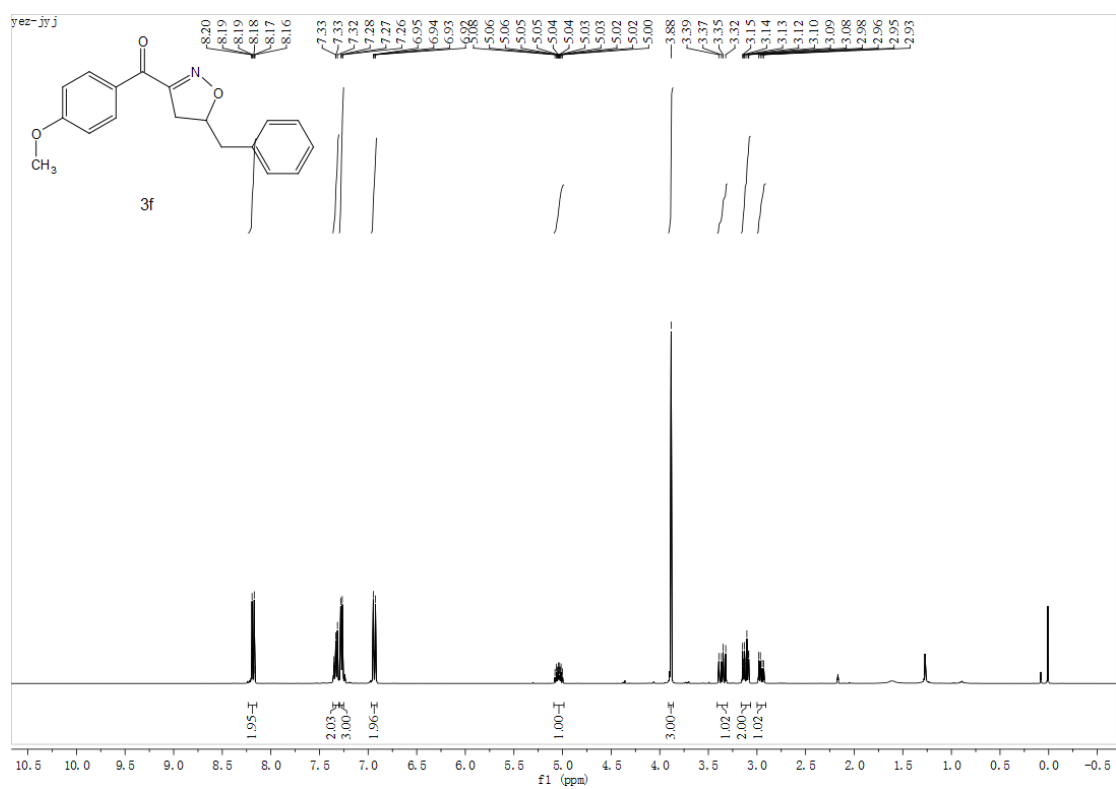

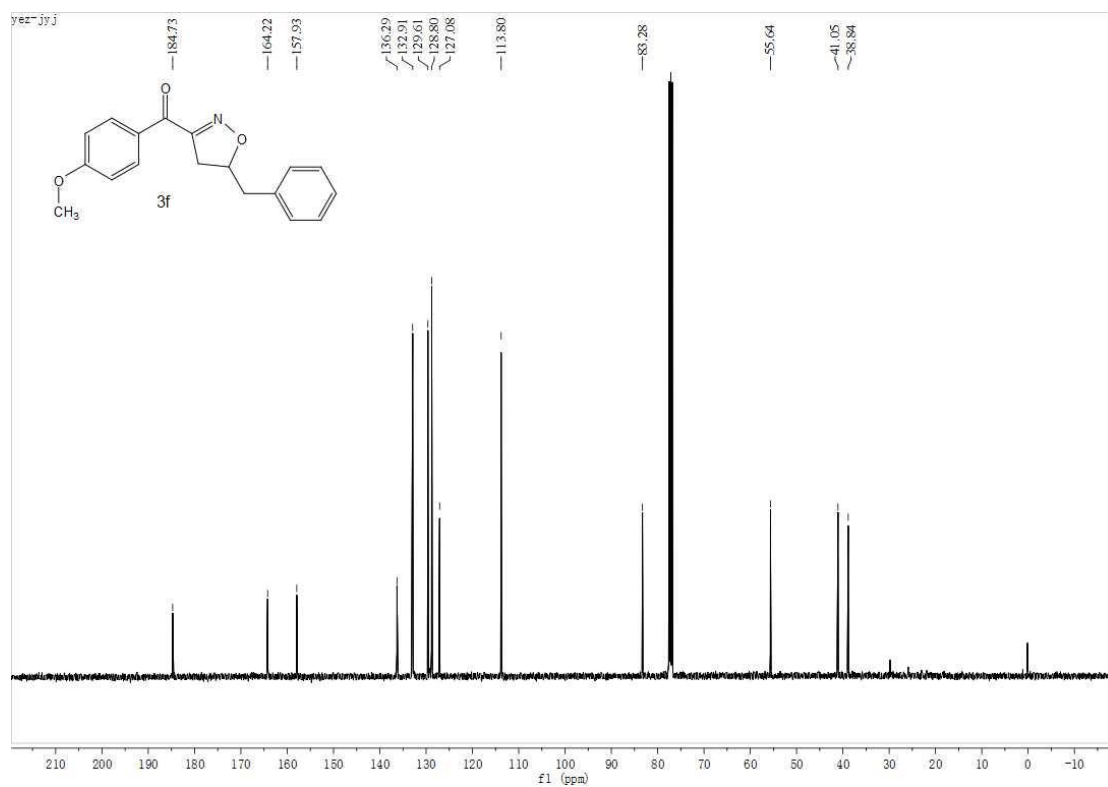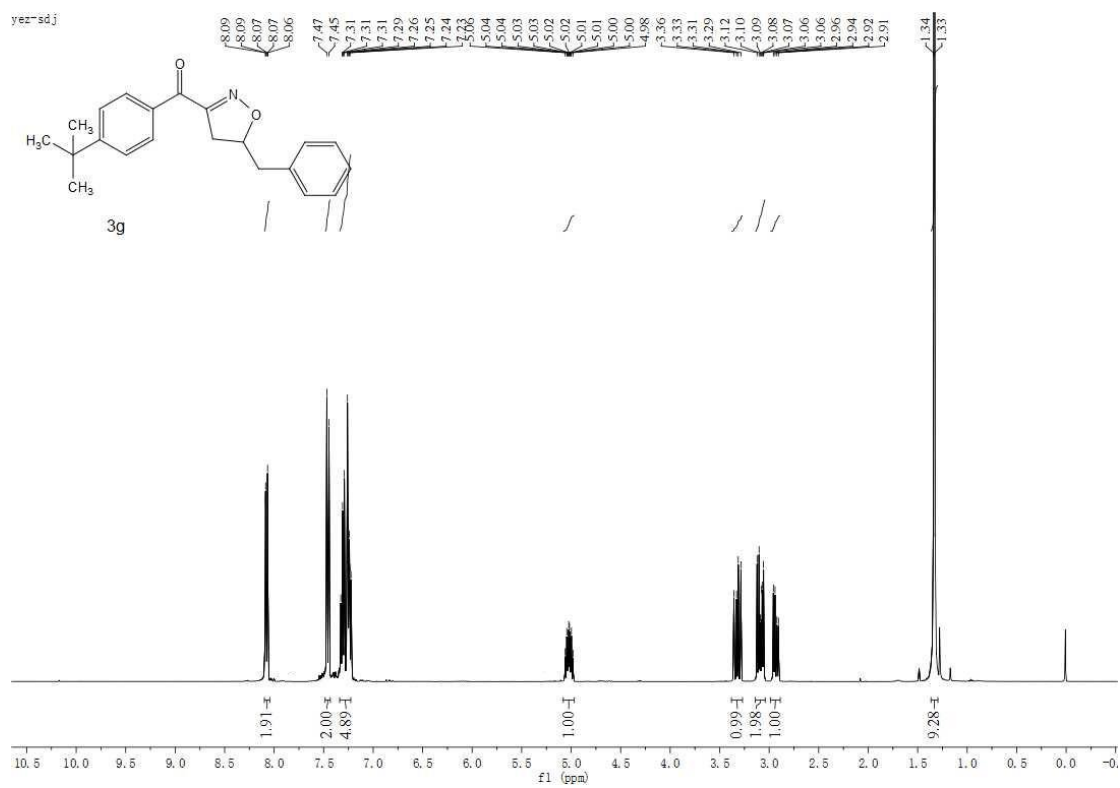



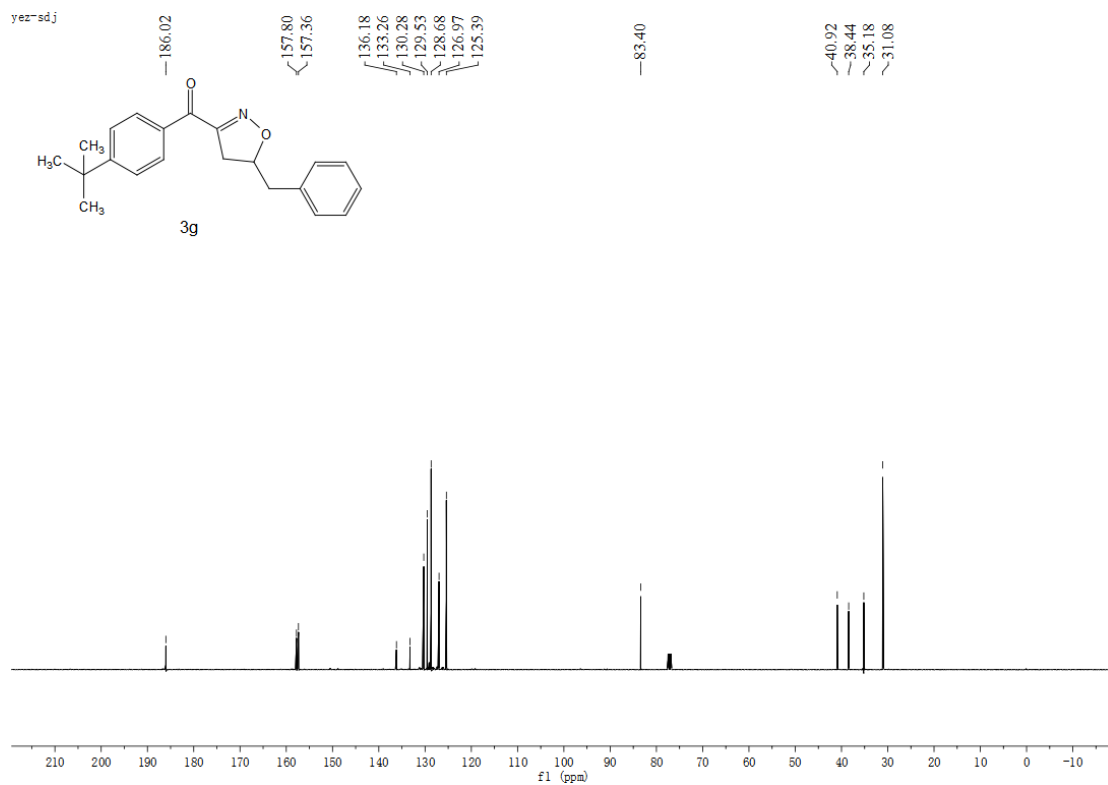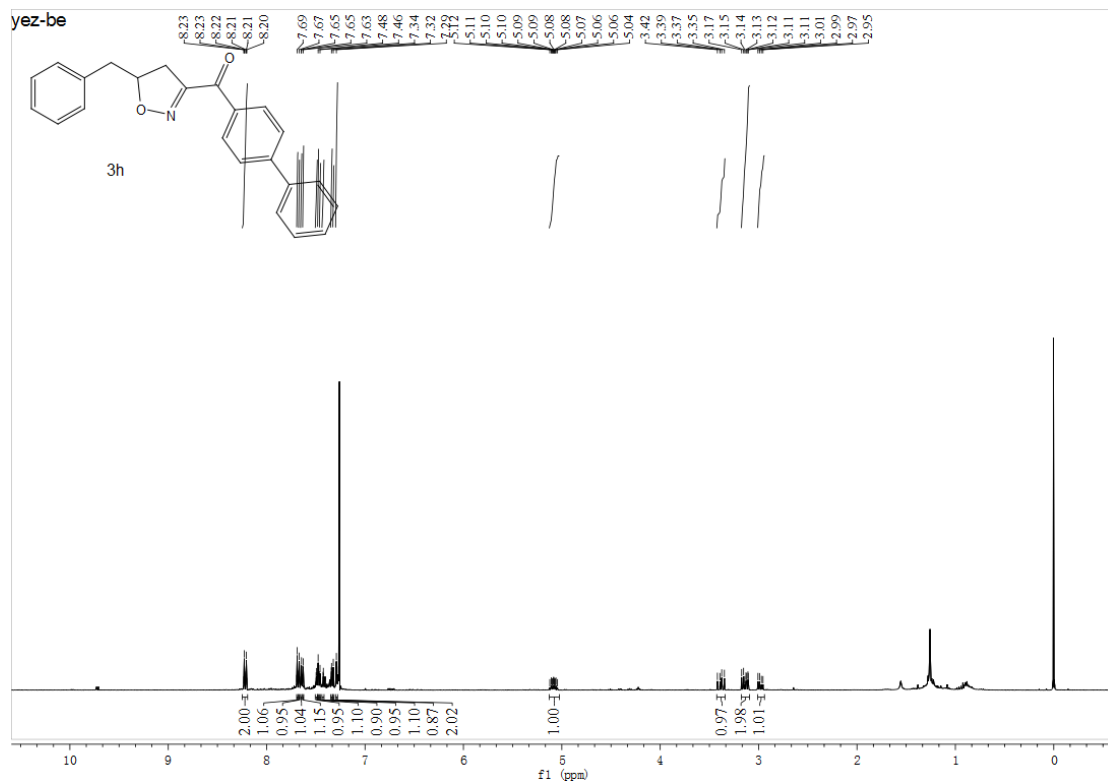

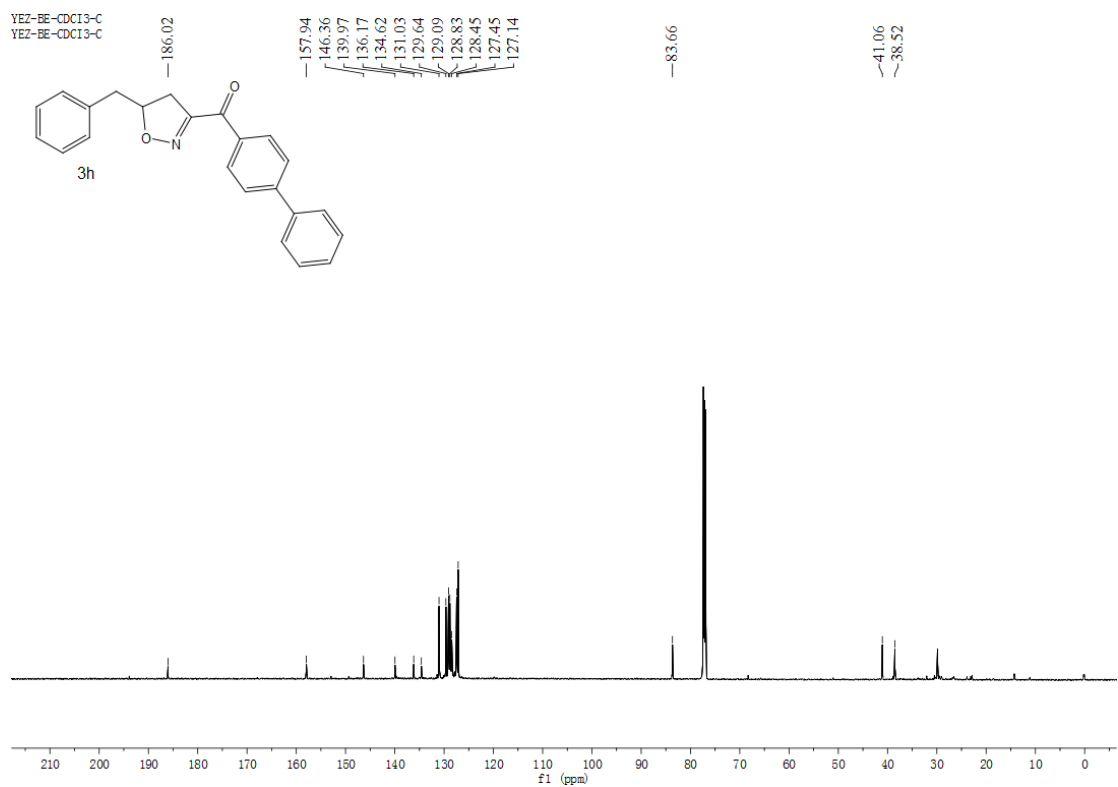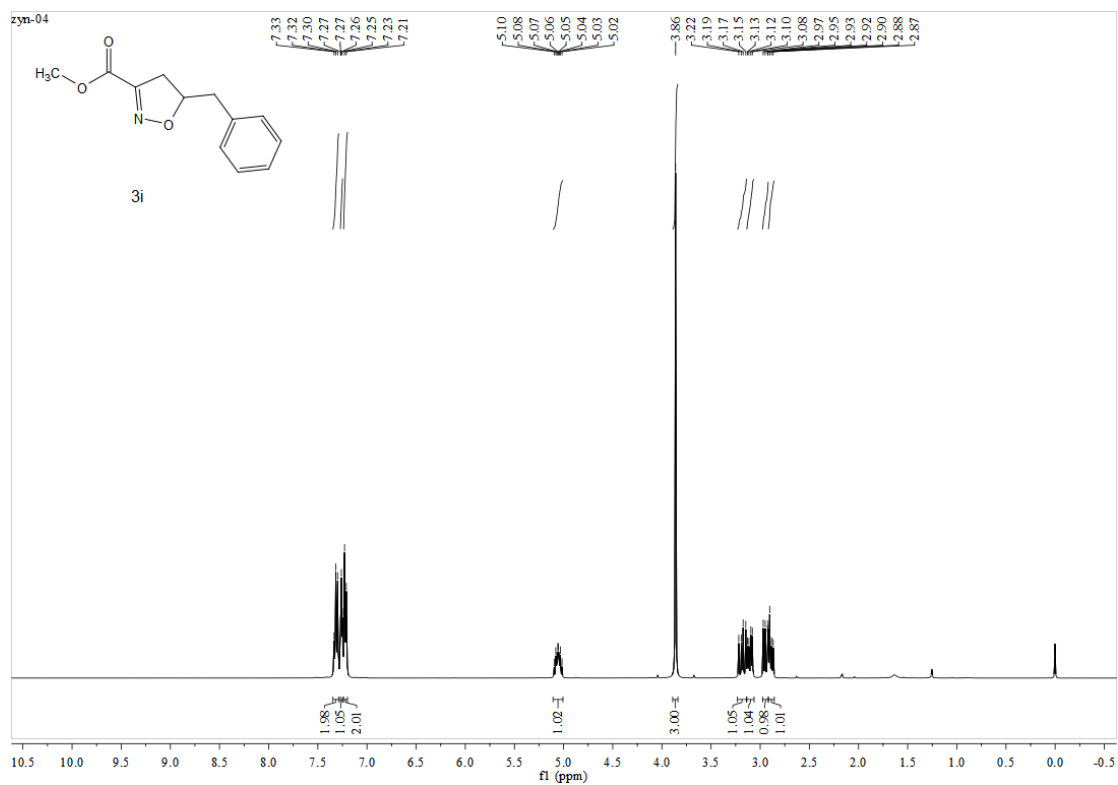

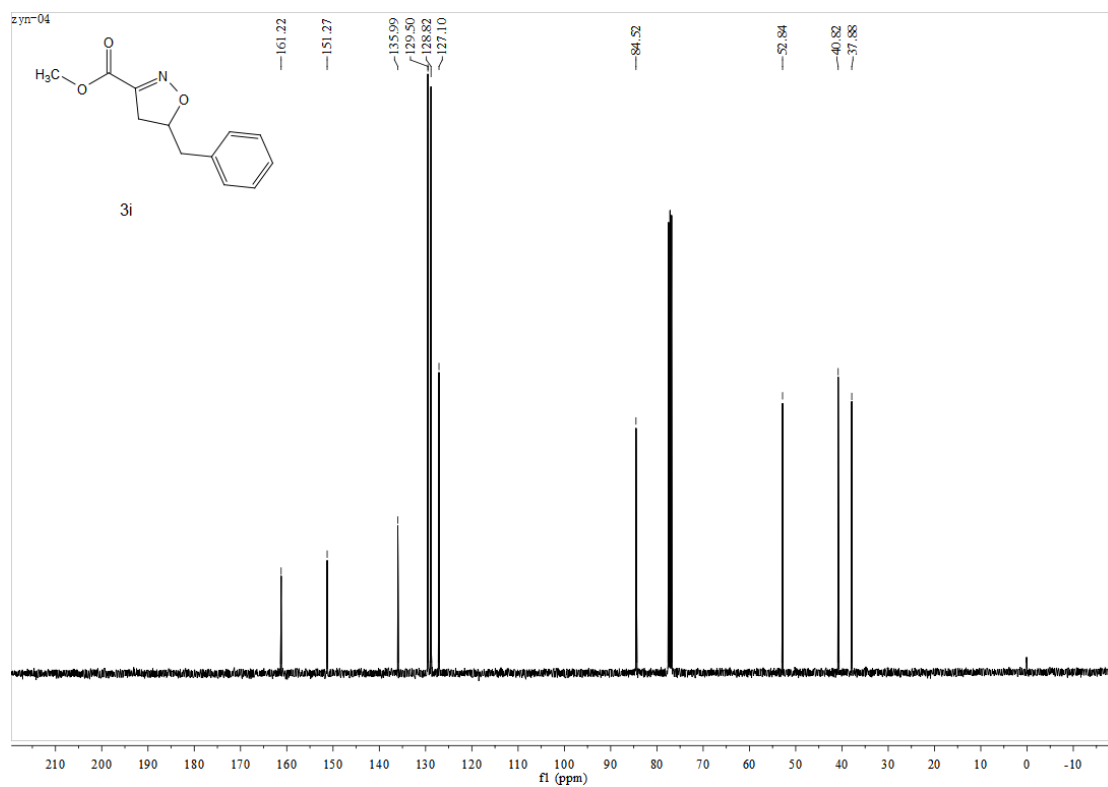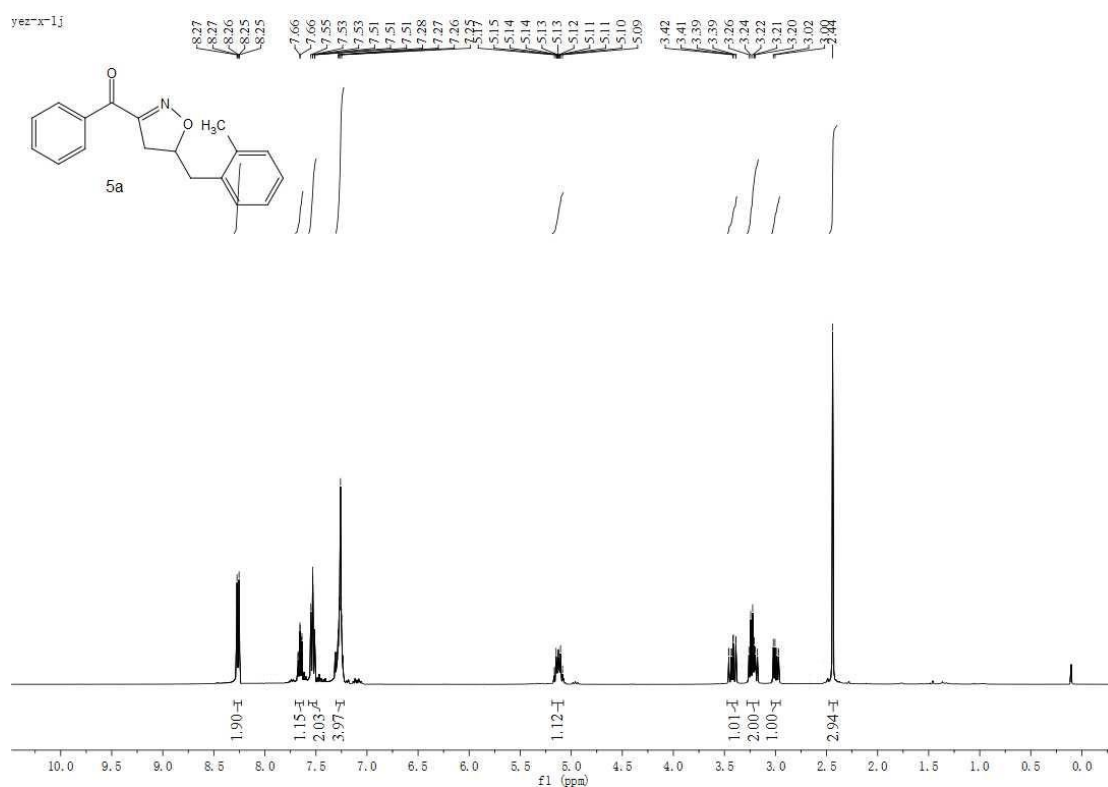

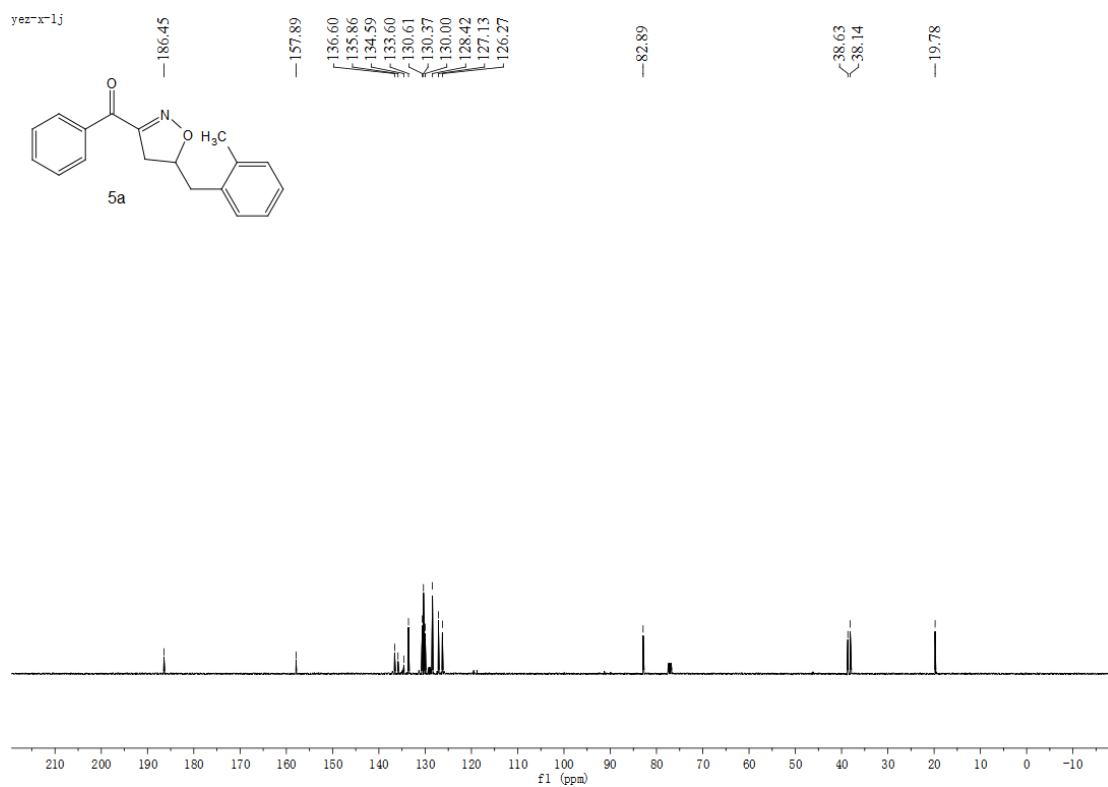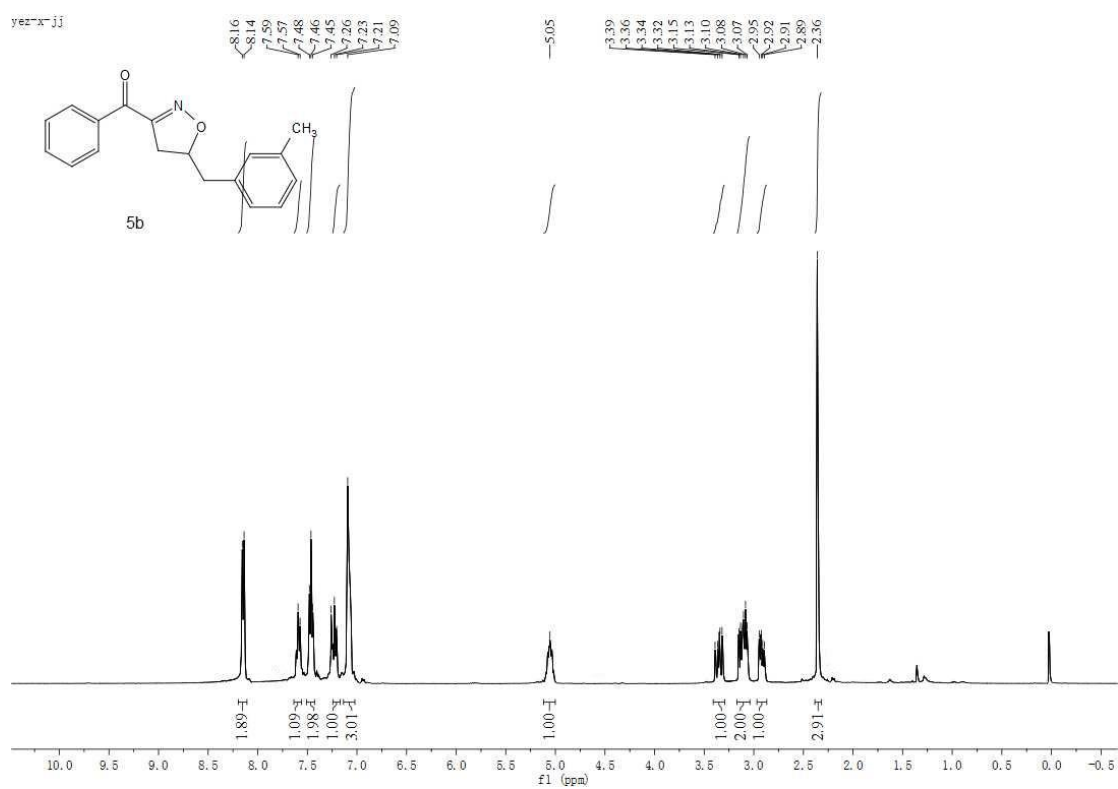

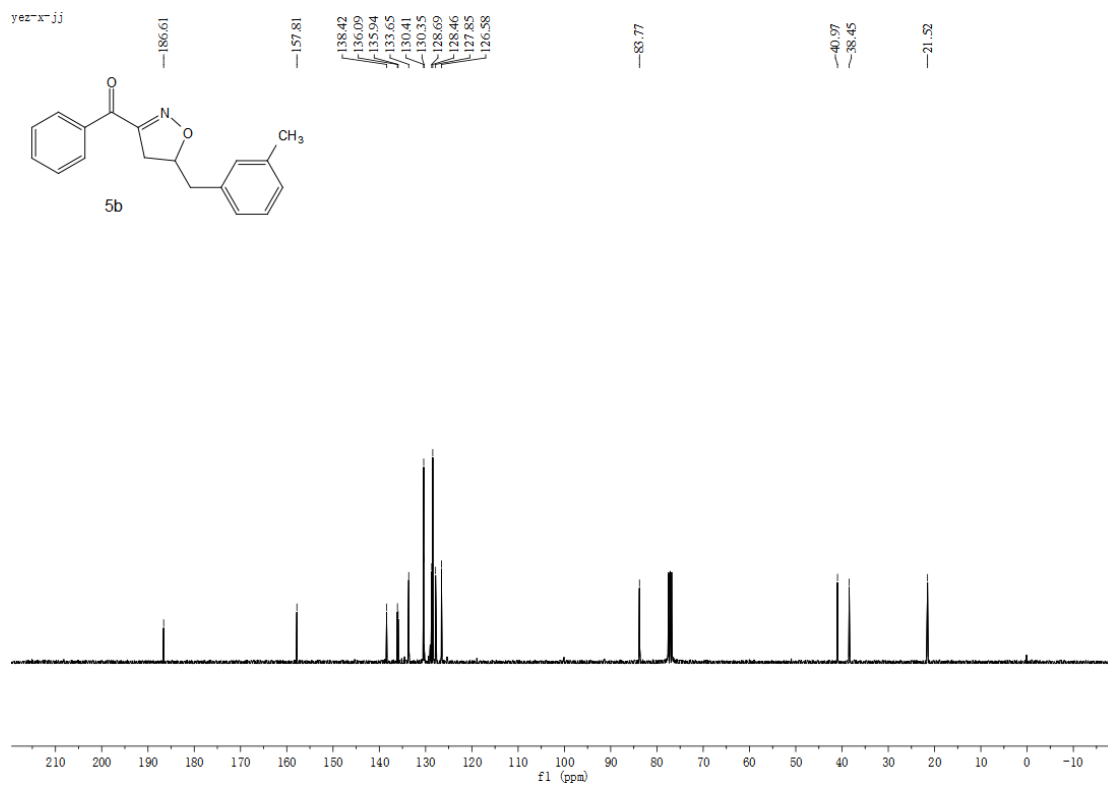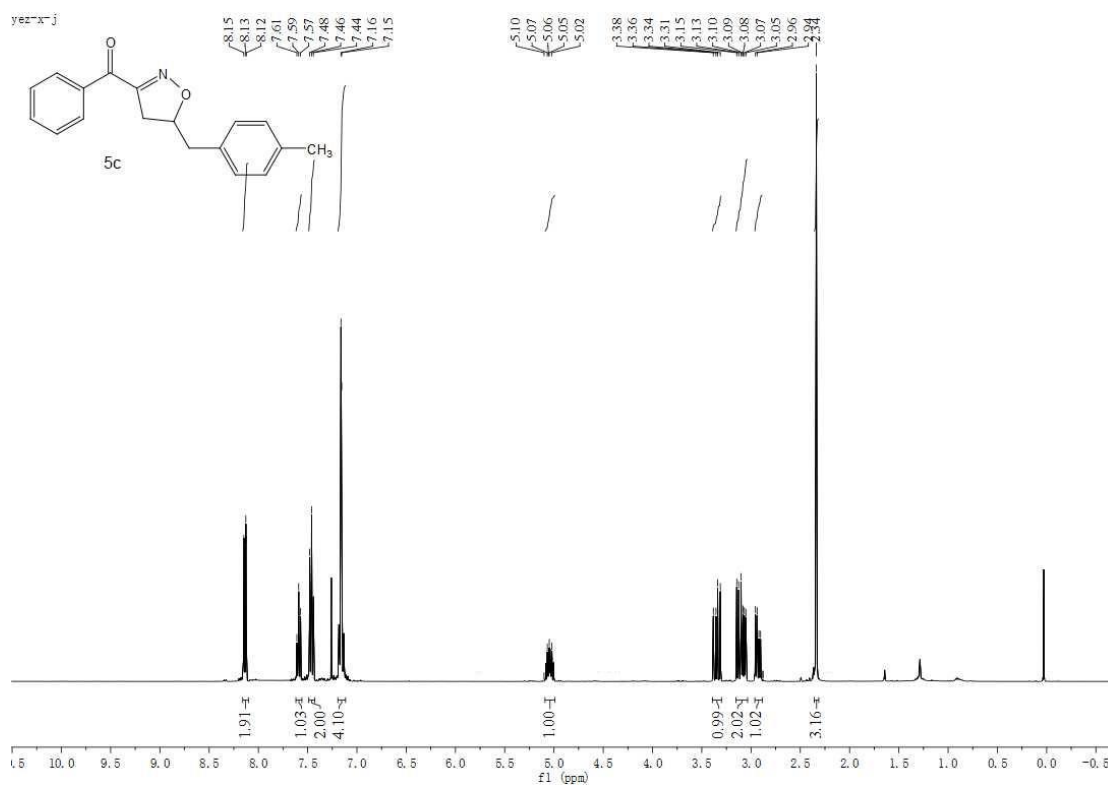

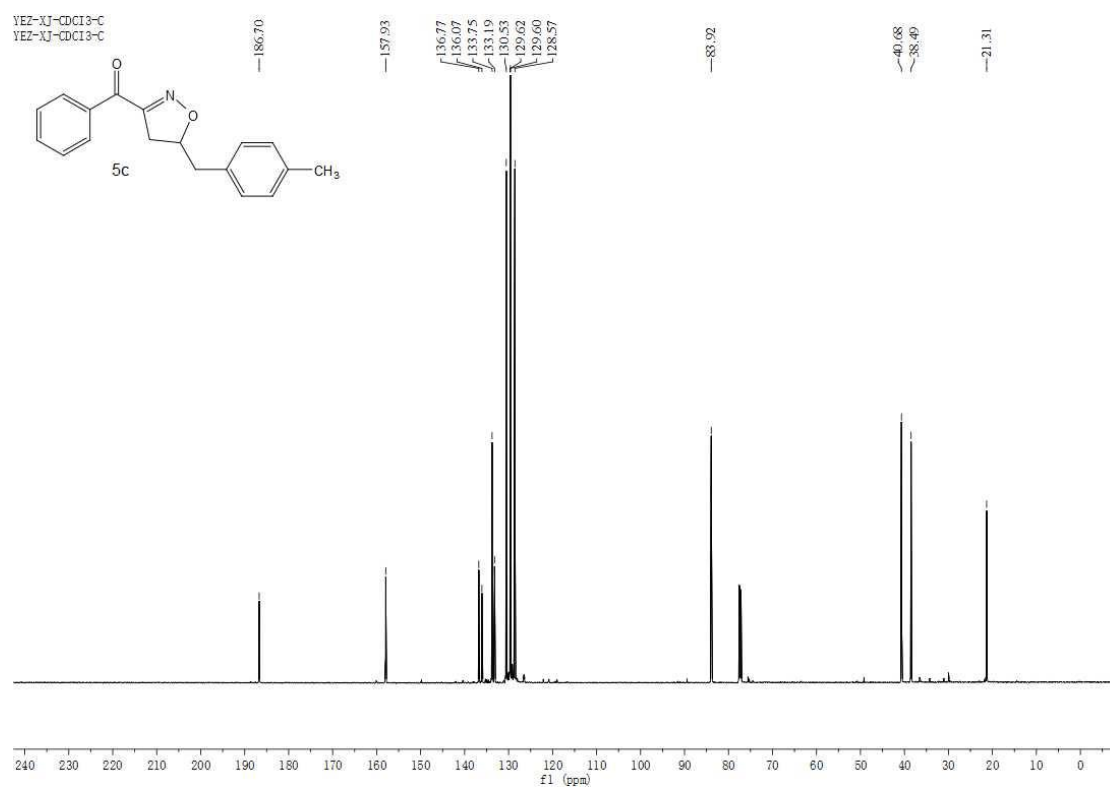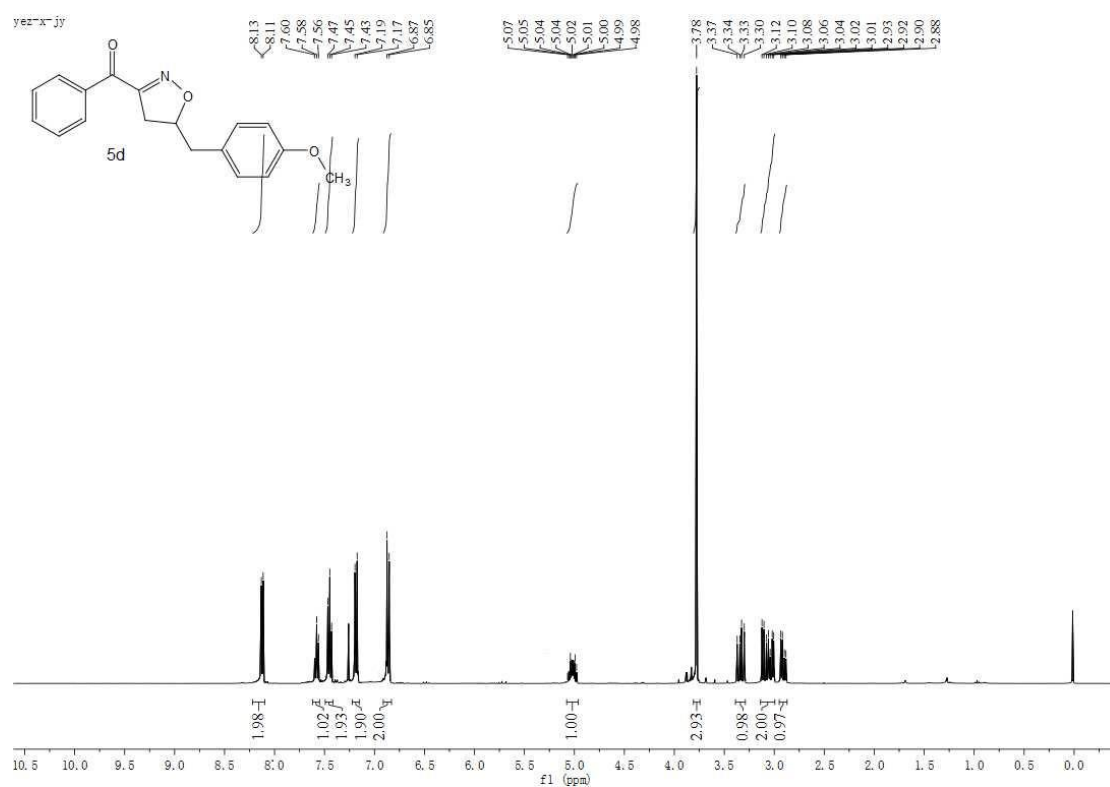

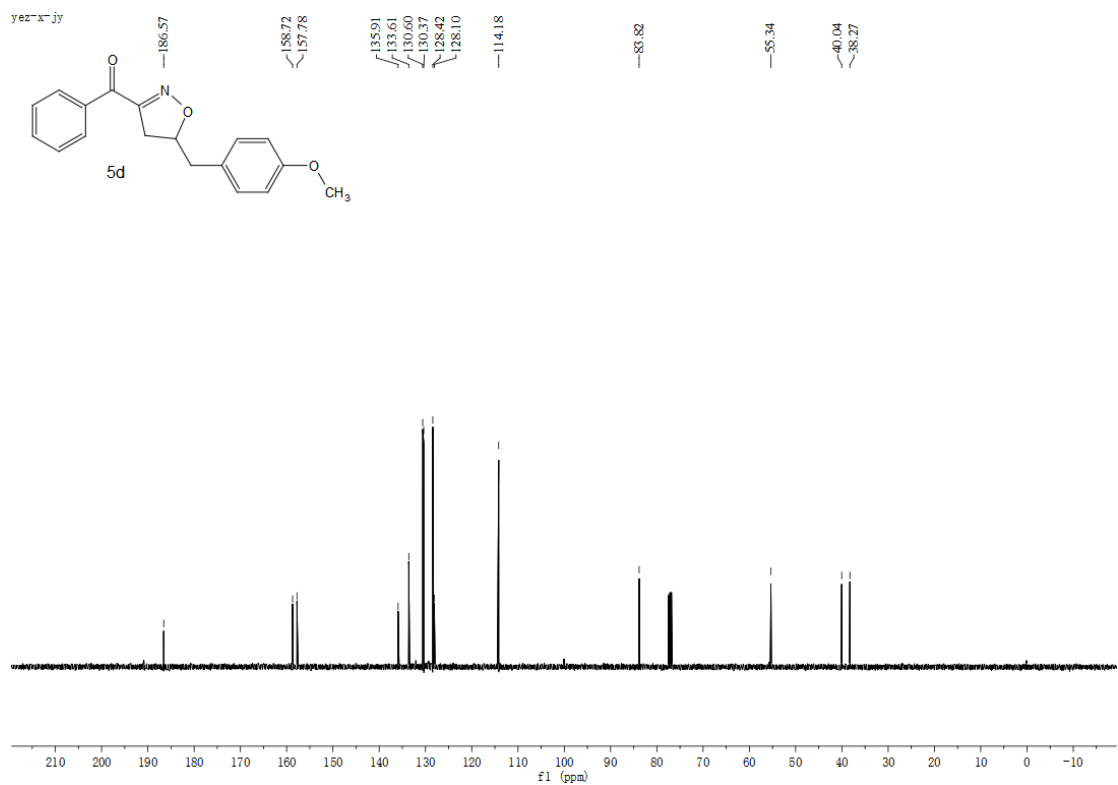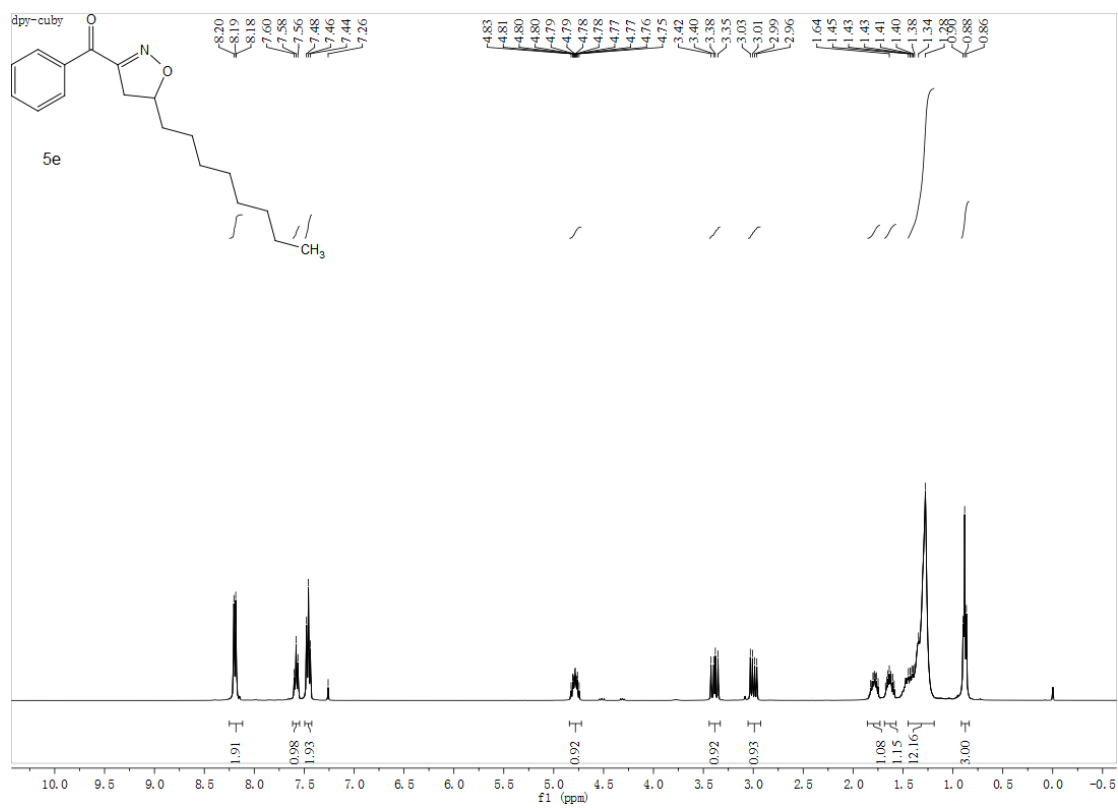

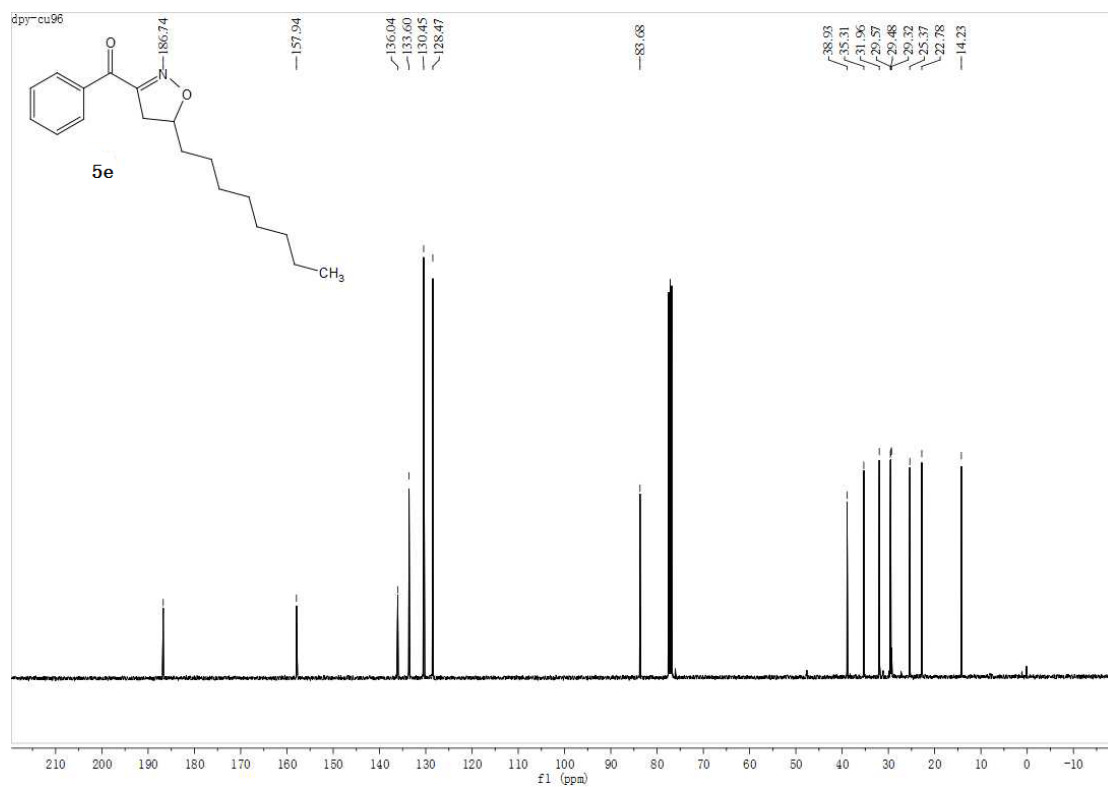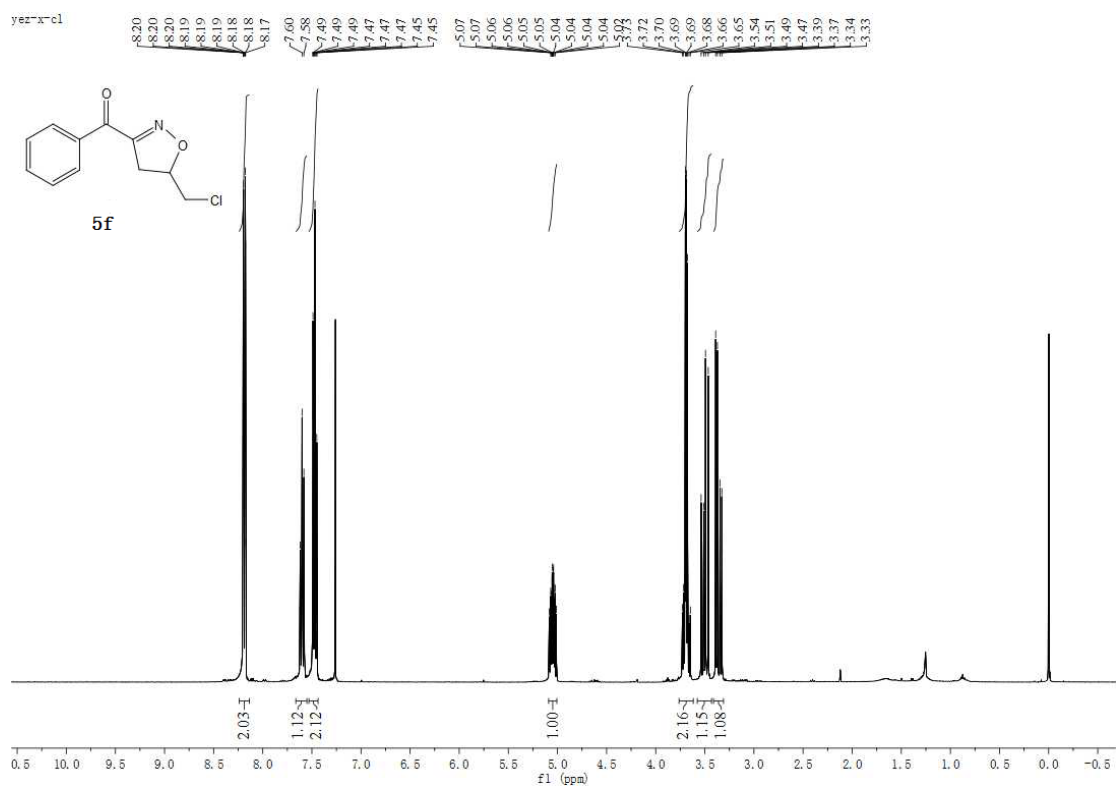



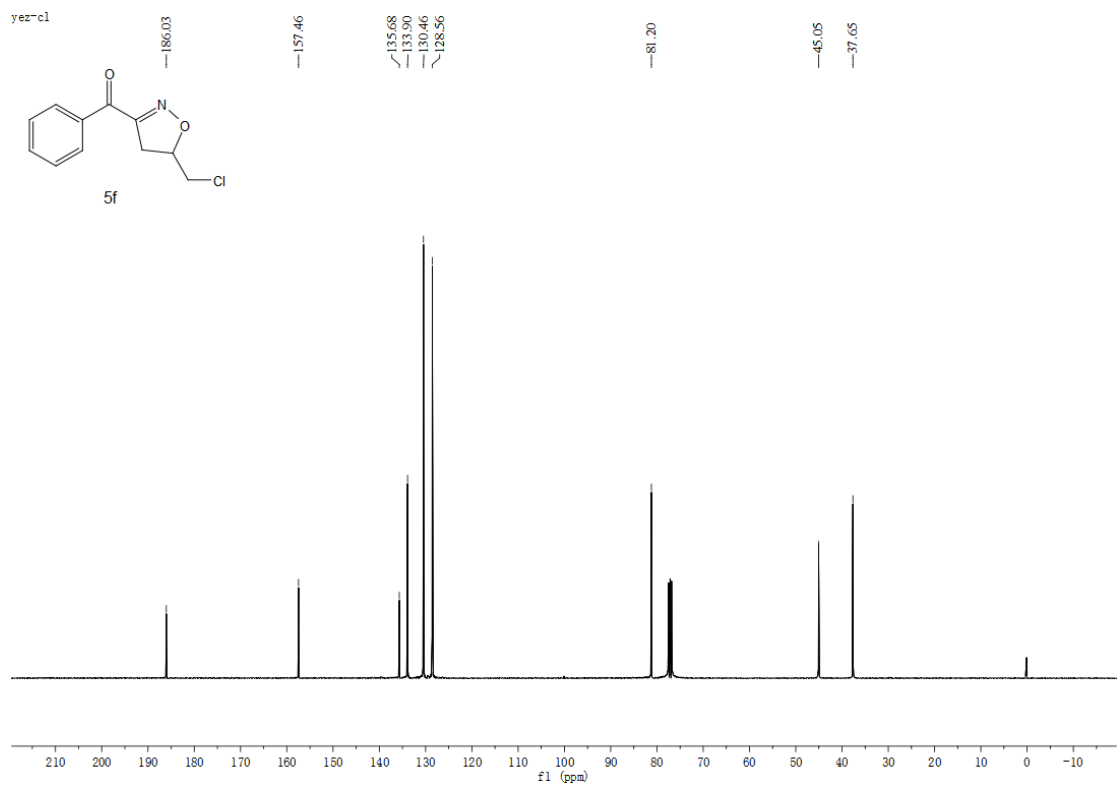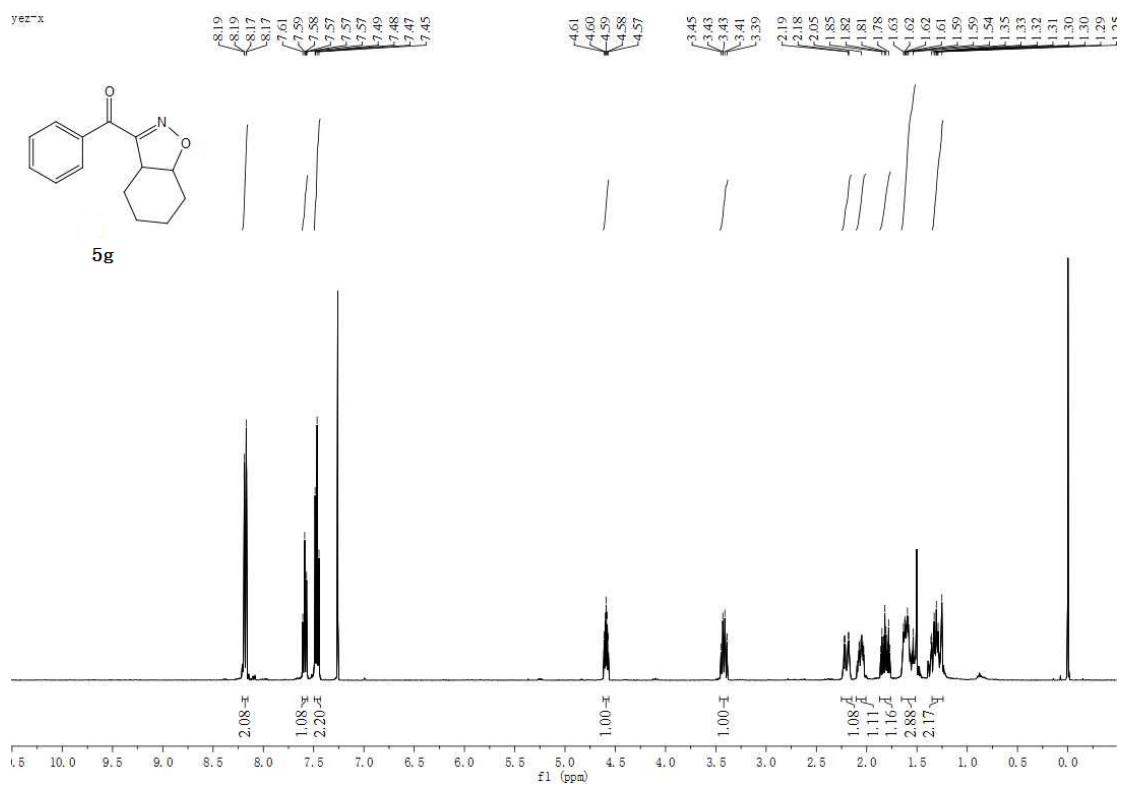

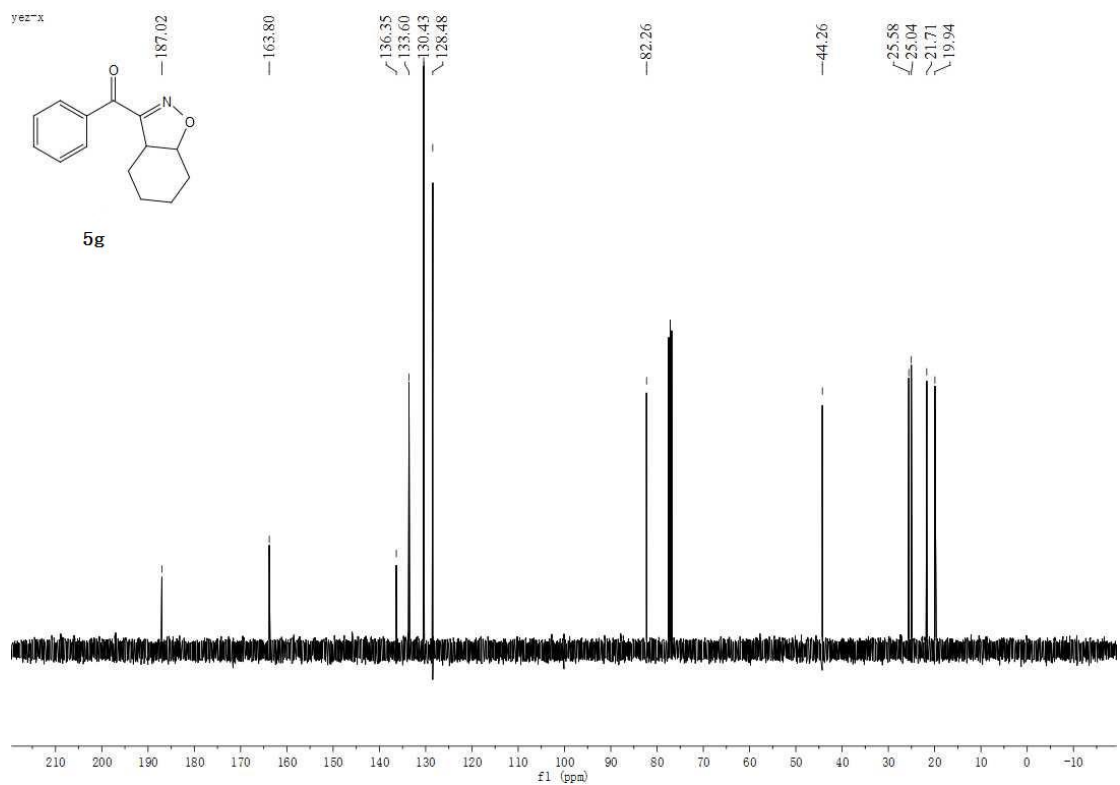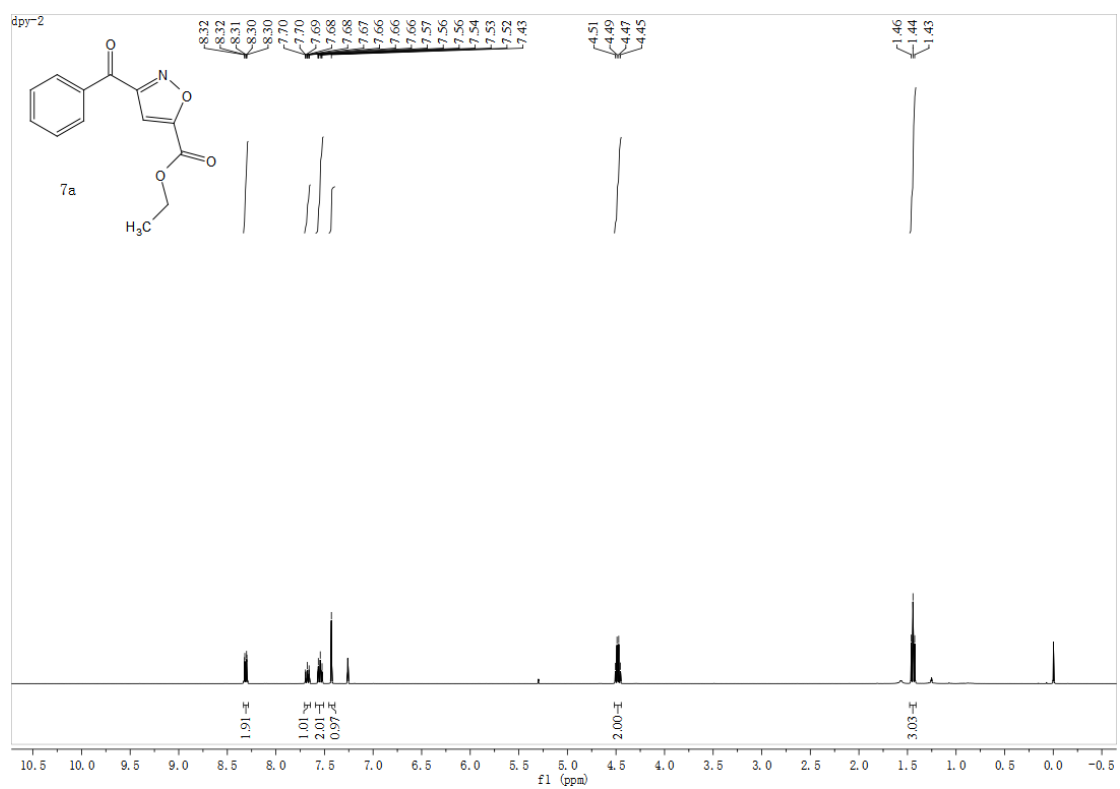

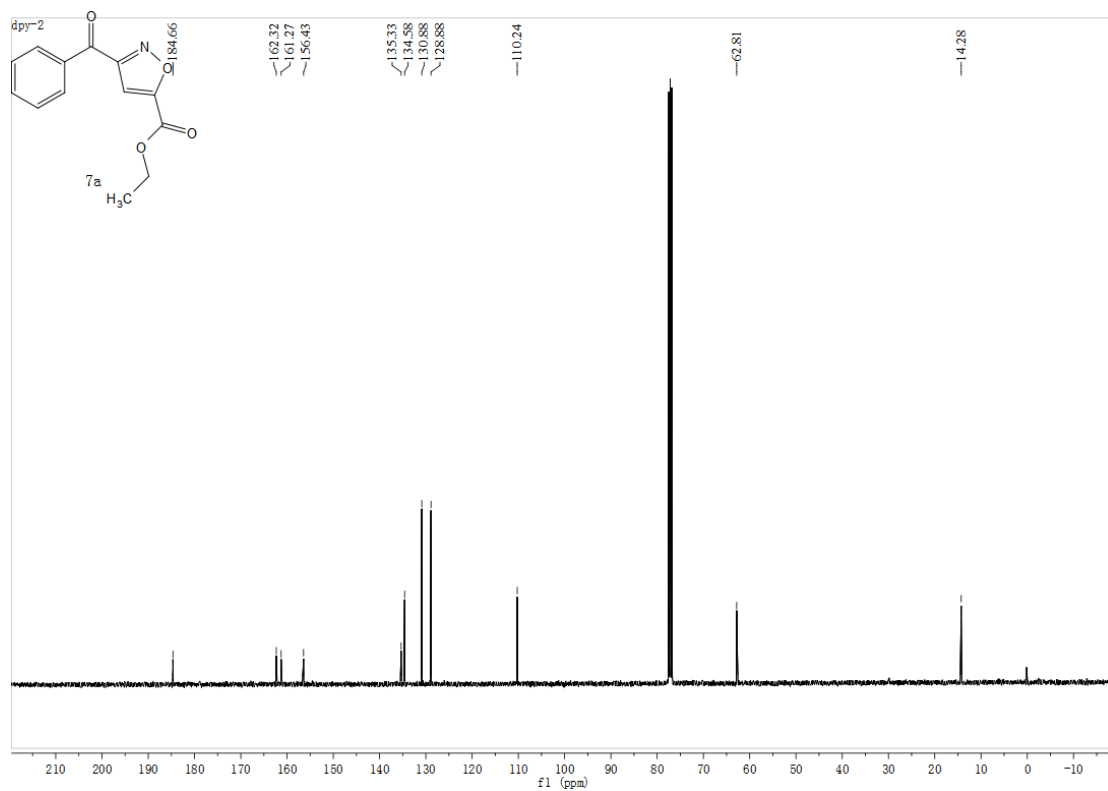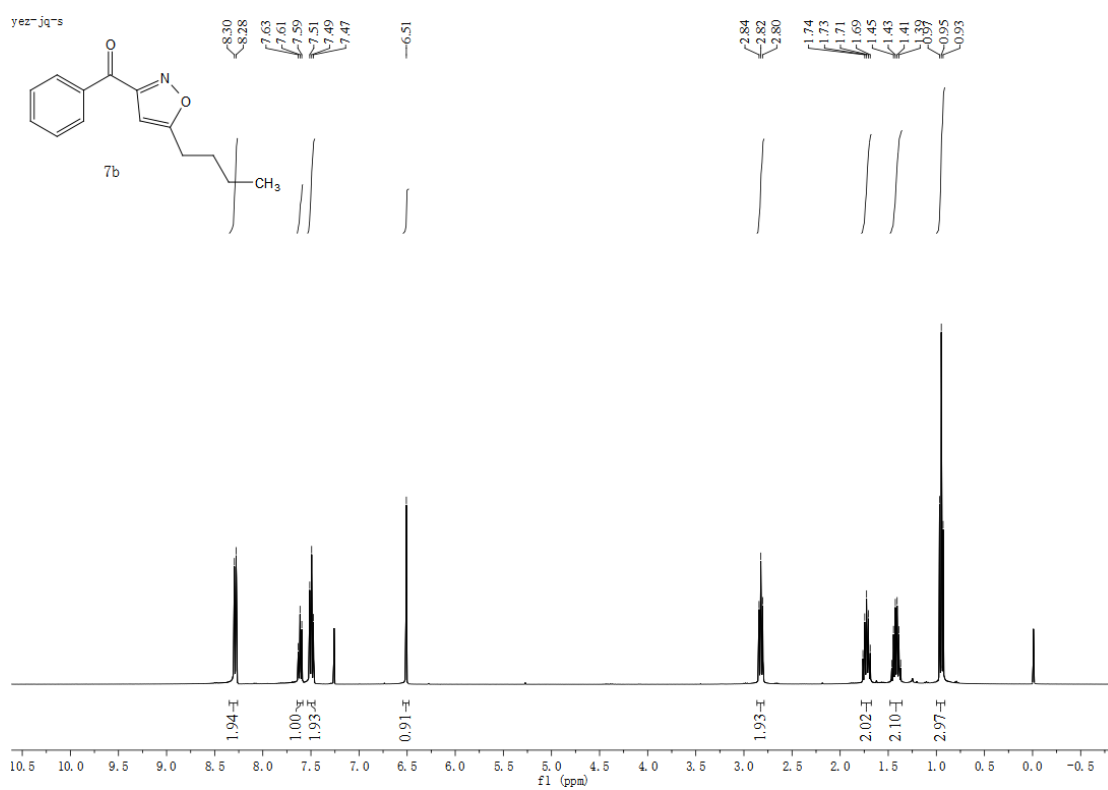

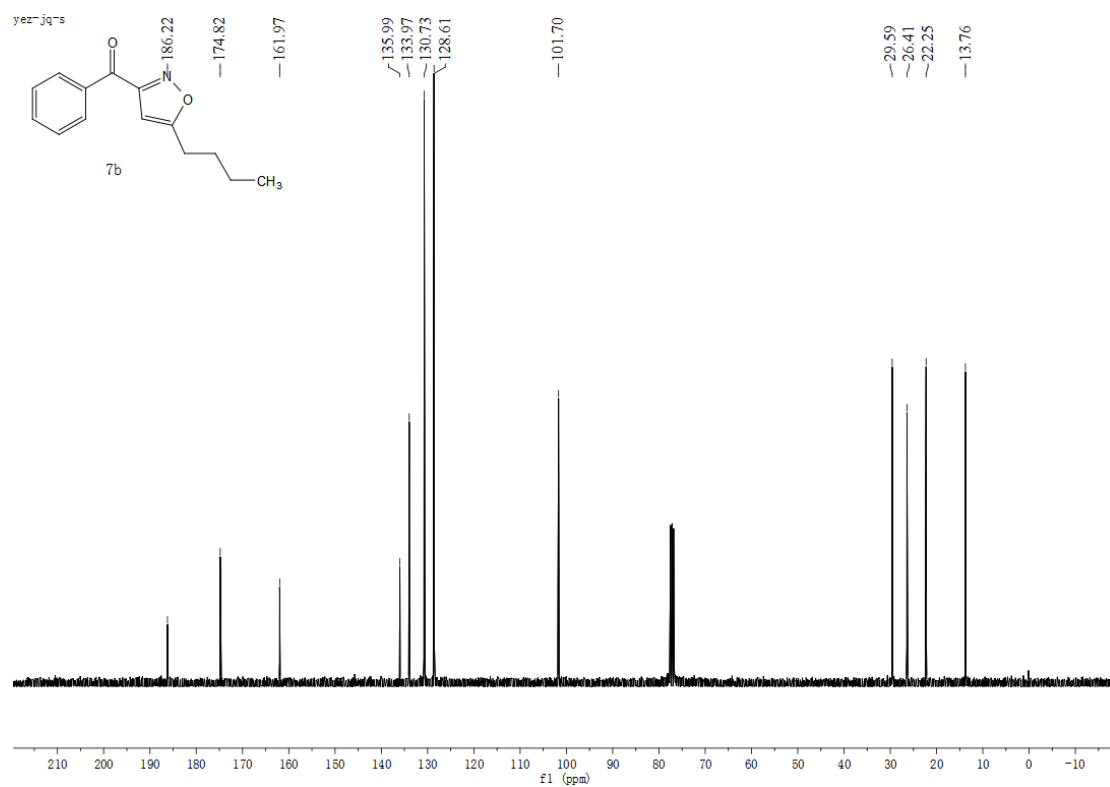

Supplement: s1 [file s1]
